# Supplementary material for: Two Mechanisms Produce Mutation Hotspots at DNA Breaks in Escherichia coli
Source: PubMed Central journal article supplement — Cell Rep. 2012 Oct 25;2(4):714–21. doi: 10.1016/j.celrep.2012.08.033 (PMC3607216; doi:10.1016/j.celrep.2012.08.033), 2012-10-25
Supplement: mmc1.pdf [file mmc1.pdf]

**Table S1. *Escherichia coli* K12 Strains and Plasmids Used in This Study\***

| Plasmid/<br>Strain | Relevant Genotype                                                                                                                        | Reference or<br>Source                                           |
|--------------------|------------------------------------------------------------------------------------------------------------------------------------------|------------------------------------------------------------------|
| pKD3               | Source of FRT <i>cat</i> FRT                                                                                                             | (Datsenko and Wanner, 2000)                                      |
| pKD4               | Source of FRTKanFRT                                                                                                                      | (Datsenko and Wanner, 2000)                                      |
| pKD46              | <i>ori101 repA101ts P<sub>BAD</sub>-gam-bet-exo Amp<sup>R</sup></i>                                                                      | (Datsenko and Wanner, 2000)                                      |
| pBBR1MCS2          | Broad-host-range vector; Kan <sup>R</sup>                                                                                                | (Kovach et al., 1995)                                            |
| pCP20              | Yeast Flp recombinase on a temperature-sensitive replicon<br><i>λ<sub>p-FLP</sub>, λcIts857, RepTS, Amp<sup>R</sup>, Cam<sup>R</sup></i> | (Cherepanov and Wackernagel, 1995)                               |
| BW25113            | [pKD46]                                                                                                                                  | (Datsenko and Wanner, 2000)                                      |
| FC36               | $\Delta(lac-proB)_{XIII} ara thi Rif^R$                                                                                                  | (Cairns and Foster, 1991)                                        |
| FC40               | $\Delta(lac-proB)_{XIII} ara thi Rif^R [F' lacI33\Omega lacZ proAB^+]$                                                                   | (Cairns and Foster, 1991)                                        |
| JW2787             | $\Delta recD::FRTKanFRT$                                                                                                                 | (Baba et al., 2006)                                              |
| SMR3525            | FC40 $\Delta umuCD::cat$                                                                                                                 | (McKenzie et al., 2000)                                          |
| SMR4336            | FC40 [F' <i>mhpC34::Tn10dtetA+1</i> ]                                                                                                    | (Bull et al., 2001)                                              |
| SMR4562            | Independent construction of FC40                                                                                                         | (McKenzie et al., 2000)                                          |
| SMR5822            | BW25113 [pKD46]                                                                                                                          | (McKenzie et al., 2003)                                          |
| SMR5833            | SMR4562 [pKD46]                                                                                                                          | (McKenzie et al., 2003)                                          |
| SMR5875            | $\Delta dinB50::FRTKanFRT$                                                                                                               | (McKenzie, 2002)                                                 |
| SMR6233            | MG1655 [pKD46]                                                                                                                           | MG1655 x pKD46                                                   |
| SMR6272            | SMR4562 $\Delta araBAD567$                                                                                                               | (Ponder et al., 2005)                                            |
| SMR7255            | FC36 <i>leu::Tn10 ara+</i>                                                                                                               | Lab collection                                                   |
| SMR7258            | FC36 $\Delta att\lambda::P_{BADI}-Scel leu::Tn10$                                                                                        | (Ponder et al., 2005)                                            |
| SMR10769           | FC40 [F' <i>mhpC34::Tn10dtetA+1</i> ] [pKD46]                                                                                            | SMR4336 x pKD46                                                  |
| SMR10770           | FC40 [F' <i>mhpC34::Tn10dtetA+1FRTcatFRT</i> ]                                                                                           | SMR10769 x Short homology from pKD3 using primers P1 and P2      |
| SMR10771           | SMR4562 KanI <i>Scel</i> siteA'                                                                                                          | SMR5833 x Short homology from pBBR1MCS2 using primer P57 and P58 |
| SMR10772           | FC36 $\Delta araBAD567$                                                                                                                  | SMR7255 x P1 (SMR6272)                                           |
| SMR10774           | FC36 $\Delta araBAD567 \Delta att\lambda::P_{BADI}-Scel$                                                                                 | SMR7258 x P1 (SMR6272)                                           |
| SMR10777           | SMR4562 3ChiKanI <i>Scel</i> siteA                                                                                                       | SMR5833 x Short homology from pBBR1MCS2 using primers P3 and P4  |
| SMR10782           | SMR4562 <i>tet3FRTcatFRT</i>                                                                                                             | SMR5833 x Short homology from SMR10770 using primers P9 and P10  |
| SMR10785           | FC36 $\Delta araBAD567 tet3FRTcatFRT$                                                                                                    | SMR10772 x P1 (SMR10782)                                         |
| SMR10786           | FC36 $\Delta araBAD567 \Delta att\lambda::P_{BADI}-Scel tet3FRTcatFRT$                                                                   | SMR10774 x P1 (SMR10782)                                         |
| SMR10787           | FC36 $\Delta araBAD567 tet3FRTcatFRT$ 3ChiKanI <i>Scel</i> siteA                                                                         | SMR10785 x P1                                                    |

| Plasmid/<br>Strain | Relevant Genotype                                                                                                  | Reference or<br>Source                                                       |
|--------------------|--------------------------------------------------------------------------------------------------------------------|------------------------------------------------------------------------------|
|                    |                                                                                                                    | (SMR10777)                                                                   |
| SMR10788           | FC36 $\Delta araBAD567 \Delta att\lambda::P_{BADI}$ -Scel <i>tet3FRTcatFRT</i> 3ChiKanIScelsiteA                   | SMR10786 x P1<br>(SMR10777)                                                  |
| SMR10789           | SMR4562 3ChiKanIScelsiteA [pKD46]                                                                                  | SMR10777 x pKD46                                                             |
| SMR10796           | SMR4562 <i>tet2FRTcatFRT</i>                                                                                       | SMR5833 x Short<br>homology from<br>SMR10770 using<br>primers P5 and P6      |
| SMR10797           | FC36 $\Delta araBAD567 tet2FRTcatFRT$                                                                              | SMR10772 x P1<br>(SMR10796)                                                  |
| SMR10798           | FC36 $\Delta araBAD567 \Delta att\lambda::P_{BADI}$ -Scel <i>tet2FRTcatFRT</i>                                     | SMR10774 x P1<br>(SMR10796)                                                  |
| SMR10799           | FC36 $\Delta araBAD567 tet2FRTcatFRT$ 3ChiKanIScelsiteA                                                            | SMR10797 x P1<br>(SMR10777)                                                  |
| SMR10800           | FC36 $\Delta araBAD567 \Delta att\lambda::P_{BADI}$ -Scel <i>tet2FRTcatFRT</i> 3ChiKanIScelsiteA                   | SMR10798 x P1<br>(SMR10777)                                                  |
| SMR10804           | SMR4562 <i>tet17FRTcatFRT</i>                                                                                      | SMR5833 x Short<br>homology from<br>SMR10770 using<br>primers P45 and<br>P46 |
| SMR10805           | FC36 $\Delta araBAD567 tet17FRTcatFRT$                                                                             | SMR10772 x P1<br>(SMR10804)                                                  |
| SMR10806           | FC36 $\Delta araBAD567 \Delta att\lambda::P_{BADI}$ -Scel <i>tet17FRTcatFRT</i>                                    | SMR10774 x P1<br>(SMR10804)                                                  |
| SMR10807           | FC36 $\Delta araBAD567 tet2FRT$                                                                                    | SMR10797 x pCP20                                                             |
| SMR10808           | FC36 $\Delta araBAD567 \Delta att\lambda::P_{BADI}$ -Scel <i>tet2FRT</i>                                           | SMR10798 x pCP20                                                             |
| SMR10809           | FC36 $\Delta araBAD567 tet17FRTcatFRT$ 3ChiKanIScelsiteA                                                           | SMR10805 x P1<br>(SMR10777)                                                  |
| SMR10810           | FC36 $\Delta araBAD567 \Delta att\lambda::P_{BADI}$ -Scel <i>tet17FRTcatFRT</i> 3ChiKanIScelsiteA                  | SMR10806 x P1<br>(SMR10777)                                                  |
| SMR10815           | FC36 $\Delta araBAD567 \Delta att\lambda::P_{BADI}$ -Scel <i>tet2FRT \Delta recD::FRTKanFRT</i>                    | SMR10808 x P1<br>JW2787                                                      |
| SMR10828           | FC36 $\Delta araBAD567 \Delta att\lambda::P_{BADI}$ -Scel <i>tet2FRT \Delta recD::FRT</i>                          | SMR10815 x pCP20                                                             |
| SMR10850           | FC36 $\Delta araBAD567 tet2FRT$ 3ChiKanIScelsiteA                                                                  | SMR10799 x pCP20                                                             |
| SMR10858           | FC36 $\Delta araBAD567 \Delta att\lambda::P_{BADI}$ -Scel <i>tet2FRT \Delta recD::FRT</i><br>3ChiKanIScelsiteA     | SMR10828 x P1<br>(SMR10777)                                                  |
| SMR10865           | FC36 $\Delta araBAD567 tet2FRT$ 3ChiKanIScelsiteA                                                                  | SMR10807 x P1<br>(SMR10850)                                                  |
| SMR10866           | FC36 $\Delta araBAD567 \Delta att\lambda::P_{BADI}$ -Scel <i>tet2FRT</i> 3ChiKanIScelsiteA                         | SMR10808 x P1<br>(SMR10850)                                                  |
| SMR10868           | FC36 $\Delta araBAD567 \Delta att\lambda::P_{BADI}$ -Scel <i>tet2FRT</i> 3ChiKanIScelsiteA<br>$\Delta dinB50::FRT$ | (Shee et al., 2011)                                                          |
| SMR10896           | SMR4562 3ChiKanIScelsiteA <i>tet1FRTcatFRT</i>                                                                     | SMR10789 x Short<br>homology from<br>SMR10770 using<br>primers P7 and P8     |
| SMR10900           | FC36 $\Delta araBAD567$ 3ChiKanIScelsiteA <i>tet1FRTcatFRT</i>                                                     | SMR10772 x P1<br>(SMR10896)                                                  |
| SMR10901           | FC36 $\Delta araBAD567 \Delta att\lambda::P_{BADI}$ -Scel 3ChiKanIScelsiteA <i>tet1FRTcatFRT</i>                   | SMR10774 x P1<br>(SMR10896)                                                  |
| SMR11694           | SMR4562 <i>tet9FRTcatFRT</i>                                                                                       | SMR5833 x Short<br>homology from<br>SMR10770 using<br>primers P19 and<br>P20 |
| SMR11722           | FC36 $\Delta araBAD567 tet9FRTcatFRT$                                                                              | SMR10772 x P1<br>(SMR11694)                                                  |
| SMR11723           | FC36 $\Delta araBAD567 \Delta att\lambda::P_{BADI}$ -Scel <i>tet9FRTcatFRT</i>                                     | SMR10774 x P1                                                                |

| Plasmid/<br>Strain | Relevant Genotype                                                                                   | Reference or<br>Source                                                        |
|--------------------|-----------------------------------------------------------------------------------------------------|-------------------------------------------------------------------------------|
|                    |                                                                                                     | (SMR11694)                                                                    |
| SMR11724           | FC36 $\Delta araBAD567$ <i>tet9FRTcatFRT</i> 3ChiKanIScelsiteA                                      | SMR11722 x P1<br>(SMR10777)                                                   |
| SMR11725           | FC36 $\Delta araBAD567$ $\Delta att\lambda::P_{BADI}$ -Scel <i>tet9FRTcatFRT</i> 3ChiKanIScelsiteA  | SMR11723 x P1<br>(SMR10777)                                                   |
| SMR11763           | SMR4562 3ChiKanIScelsiteB                                                                           | SMR5833 x Short<br>homology from<br>pBBR1MCS2 using<br>primers P21 and<br>P22 |
| SMR11764           | FC36 $\Delta araBAD567$ <i>tet9FRTcatFRT</i> 3ChiKanIScelsiteB                                      | SMR11722 x P1<br>(SMR11763)                                                   |
| SMR11765           | FC36 $\Delta araBAD567$ $\Delta att\lambda::P_{BADI}$ -Scel <i>tet9FRTcatFRT</i> 3ChiKanIScelsiteB  | SMR11723 x P1<br>(SMR11763)                                                   |
| SMR11768           | SMR4562 3ChiKanIScelsiteC                                                                           | SMR5833 x Short<br>homology from<br>pBBR1MCS2 using<br>primers P25 and<br>P26 |
| SMR11769           | SMR4562 <i>tet13FRTcatFRT</i>                                                                       | SMR5833 x Short<br>homology from<br>SMR10770 using<br>primers P27 and<br>P28  |
| SMR11773           | FC36 $\Delta araBAD567$ <i>tet13FRTcatFRT</i>                                                       | SMR10772 x P1<br>(SMR11769)                                                   |
| SMR11774           | FC36 $\Delta araBAD567$ $\Delta att\lambda::P_{BADI}$ -Scel <i>tet13FRTcatFRT</i>                   | SMR10774 x P1<br>(SMR11769)                                                   |
| SMR11775           | FC36 $\Delta araBAD567$ <i>tet13FRTcatFRT</i> 3ChiKanIScelsiteA                                     | SMR11773 x P1<br>(SMR10777)                                                   |
| SMR11776           | FC36 $\Delta araBAD567$ $\Delta att\lambda::P_{BADI}$ -Scel <i>tet13FRTcatFRT</i> 3ChiKanIScelsiteA | SMR11774 x P1<br>(SMR10777)                                                   |
| SMR11777           | FC36 $\Delta araBAD567$ <i>tet13FRTcatFRT</i> 3ChiKanIScelsiteC                                     | SMR11773 x P1<br>(SMR11768)                                                   |
| SMR11778           | FC36 $\Delta araBAD567$ $\Delta att\lambda::P_{BADI}$ -Scel <i>tet13FRTcatFRT</i> 3ChiKanIScelsiteC | SMR11774 x P1<br>(SMR11768)                                                   |
| SMR11784           | SMR4562 <i>tet10FRTcatFRT</i>                                                                       | SMR5833 x Short<br>homology from<br>SMR10770 using<br>primers P31 and<br>P32  |
| SMR11785           | SMR4562 <i>tet4FRTcatFRT</i>                                                                        | SMR5833 x Short<br>homology from<br>SMR10770 using<br>primers P11 and<br>P12  |
| SMR11787           | FC36 $\Delta araBAD567$ <i>tet10FRTcatFRT</i>                                                       | SMR10772 x P1<br>(SMR11784)                                                   |
| SMR11788           | FC36 $\Delta araBAD567$ $\Delta att\lambda::P_{BADI}$ -Scel <i>tet10FRTcatFRT</i>                   | SMR10774 x P1<br>(SMR11784)                                                   |
| SMR11789           | FC36 $\Delta araBAD567$ 3ChiKanIScelsiteA <i>tet10FRTcatFRT</i>                                     | SMR11787 x P1<br>(SMR10777)                                                   |
| SMR11790           | FC36 $\Delta araBAD567$ $\Delta att\lambda::P_{BADI}$ -Scel 3ChiKanIScelsiteA <i>tet10FRTcatFRT</i> | SMR11788 x P1<br>(SMR10777)                                                   |
| SMR11801           | FC36 $\Delta araBAD567$ <i>tet4FRTcatFRT</i>                                                        | SMR10772 x P1<br>(SMR11785)                                                   |
| SMR11802           | FC36 $\Delta araBAD567$ $\Delta att\lambda::P_{BADI}$ -Scel <i>tet4FRTcatFRT</i>                    | SMR10774 x P1<br>(SMR11785)                                                   |
| SMR11841           | FC36 $\Delta araBAD567$ <i>tet5FRTcatFRT</i>                                                        | SMR10772 x P1                                                                 |

| Plasmid/<br>Strain | Relevant Genotype                                                                                     | Reference or<br>Source                                                       |
|--------------------|-------------------------------------------------------------------------------------------------------|------------------------------------------------------------------------------|
|                    |                                                                                                       | (SMR12439)                                                                   |
| SMR12437           | FC36 $\Delta araBAD567$ <i>tet4FRTcatFRT</i><br>3ChiKanIScelsiteA                                     | SMR11801 x P1<br>(SMR10777)                                                  |
| SMR12438           | FC36 $\Delta araBAD567$ $\Delta att\lambda::P_{BADI}$ -Scel <i>tet4FRTcatFRT</i><br>3ChiKanIScelsiteA | SMR11802 x P1<br>(SMR10777)                                                  |
| SMR12439           | SMR4562 <i>tet5FRTcatFRT</i>                                                                          | SMR5833 x Short<br>homology from<br>SMR10770 using<br>primers P13 and<br>P14 |
| SMR12440           | SMR4562 <i>tet6FRTcatFRT</i>                                                                          | SMR5833 x Short<br>homology from<br>SMR10770 using<br>primers P15 and<br>P16 |
| SMR12442           | FC36 $\Delta araBAD567$ $\Delta att\lambda::P_{BADI}$ -Scel <i>tet5FRTcatFRT</i>                      | SMR10774 x P1<br>(SMR12439)                                                  |
| SMR12443           | FC36 $\Delta araBAD567$ <i>tet6FRTcatFRT</i>                                                          | SMR10772 x P1<br>(SMR12440)                                                  |
| SMR12444           | FC36 $\Delta araBAD567$ $\Delta att\lambda::P_{BADI}$ -Scel <i>tet6FRTcatFRT</i>                      | SMR10774 x P1<br>(SMR12440)                                                  |
| SMR12445           | FC36 $\Delta araBAD567$ <i>tet5FRTcatFRT</i> 3ChiKanIScelsiteA                                        | SMR11841 x P1<br>(SMR10777)                                                  |
| SMR12446           | FC36 $\Delta araBAD567$ $\Delta att\lambda::P_{BADI}$ -Scel <i>tet5FRTcatFRT</i> 3ChiKanIScelsiteA    | SMR12442 x P1<br>(SMR10777)                                                  |
| SMR12447           | FC36 $\Delta araBAD567$ <i>tet6FRTcatFRT</i> 3ChiKanIScelsiteA                                        | SMR12443 x P1<br>(SMR10777)                                                  |
| SMR12448           | FC36 $\Delta araBAD567$ $\Delta att\lambda::P_{BADI}$ -Scel <i>tet6FRTcatFRT</i> 3ChiKanIScelsiteA    | SMR12444 x P1<br>(SMR10777)                                                  |
| SMR12449           | SMR5822 <i>tet12FRTcatFRT</i>                                                                         | SMR5822 x Short<br>homology from<br>SMR10770 using<br>primers P23 and<br>P24 |
| SMR12450           | SMR5822 <i>tet14FRTcatFRT</i>                                                                         | SMR5822 x Short<br>homology from<br>SMR10770 using<br>primers P37 and<br>P38 |
| SMR12453           | SMR5822 <i>tet7FRTcatFRT</i>                                                                          | SMR5822 x Short<br>homology from<br>SMR10770 using<br>primers P17 and<br>P18 |
| SMR12454           | FC36 $\Delta araBAD567$ <i>tet7FRTcatFRT</i>                                                          | SMR10772 x P1<br>(SMR12453)                                                  |
| SMR12455           | FC36 $\Delta araBAD567$ $\Delta att\lambda::P_{BADI}$ -Scel <i>tet7FRTcatFRT</i>                      | SMR10774 x P1<br>(SMR12453)                                                  |
| SMR12456           | FC36 $\Delta araBAD567$ <i>tet7FRTcatFRT</i> 3ChiKanIScelsiteA                                        | SMR12454 x P1<br>(SMR10777)                                                  |
| SMR12457           | FC36 $\Delta araBAD567$ $\Delta att\lambda::P_{BADI}$ -Scel <i>tet7FRTcatFRT</i> 3ChiKanIScelsiteA    | SMR12455 x P1<br>(SMR10777)                                                  |
| SMR12459           | SMR5822 <i>tet15FRTcatFRT</i>                                                                         | SMR5822 x Short<br>homology from<br>SMR10770 using<br>primers P39 and<br>P40 |
| SMR12462           | FC36 $\Delta araBAD567$ <i>tet12FRTcatFRT</i>                                                         | SMR10772 x P1<br>(SMR12449)                                                  |

| Plasmid/<br>Strain | Relevant Genotype                                                                                 | Reference or<br>Source                                            |
|--------------------|---------------------------------------------------------------------------------------------------|-------------------------------------------------------------------|
| SMR12463           | FC36 $\Delta araBAD567 \Delta att\lambda::P_{BADI}$ -Scel <i>tet12FRTcatFRT</i>                   | SMR10774 x P1 (SMR12449)                                          |
| SMR12468           | FC36 $\Delta araBAD567 tet15FRTcatFRT$                                                            | SMR10772 x P1 (SMR12459)                                          |
| SMR12469           | FC36 $\Delta araBAD567 \Delta att\lambda::P_{BADI}$ -Scel <i>tet15FRTcatFRT</i>                   | SMR10774 x P1 (SMR12459)                                          |
| SMR12470           | FC36 $\Delta araBAD567 tet12FRTcatFRT$ 3ChiKanIScelsiteB                                          | SMR12462 x P1 (SMR11763)                                          |
| SMR12471           | FC36 $\Delta araBAD567 \Delta att\lambda::P_{BADI}$ -Scel <i>tet12FRTcatFRT</i> 3ChiKanIScelsiteB | SMR12463 x P1 (SMR11763)                                          |
| SMR12476           | FC36 $\Delta araBAD567 tet15FRTcatFRT$ 3ChiKanIScelsiteB                                          | SMR12468 x P1 (SMR11763)                                          |
| SMR12477           | FC36 $\Delta araBAD567 \Delta att\lambda::P_{BADI}$ -Scel <i>tet15FRTcatFRT</i> 3ChiKanIScelsiteB | SMR12469 x P1 (SMR11763)                                          |
| SMR12478           | FC36 $\Delta araBAD567 tet14FRTcatFRT$                                                            | SMR10772 x P1 (SMR12450)                                          |
| SMR12479           | FC36 $\Delta araBAD567 \Delta att\lambda::P_{BADI}$ -Scel <i>tet14FRTcatFRT</i>                   | SMR10774 x P1 (SMR12450)                                          |
| SMR12480           | SMR5822 <i>tet2FRTcatFRT</i>                                                                      | SMR5822 x Short homology from SMR10770 using primers P43 and P44  |
| SMR12481           | FC36 $\Delta araBAD567 tet14FRTcatFRT$ 3ChiKanIScelsiteB                                          | SMR12478 x P1 (SMR11763)                                          |
| SMR12482           | FC36 $\Delta araBAD567 \Delta att\lambda::P_{BADI}$ -Scel <i>tet14FRTcatFRT</i> 3ChiKanIScelsiteB | SMR12479 x P1 (SMR11763)                                          |
| SMR12483           | FC36 $\Delta araBAD567 tet2FRTcatFRT$                                                             | SMR10772 x P1 (SMR12480)                                          |
| SMR12484           | FC36 $\Delta araBAD567 \Delta att\lambda::P_{BADI}$ -Scel <i>tet2FRTcatFRT</i>                    | SMR10774 x P1 (SMR12480)                                          |
| SMR12485           | FC36 $\Delta araBAD567 tet2FRTcatFRT$ 3ChiKanIScelsiteA                                           | SMR12483 x P1 (SMR10777)                                          |
| SMR12486           | FC36 $\Delta araBAD567 \Delta att\lambda::P_{BADI}$ -Scel <i>tet2FRTcatFRT</i> 3ChiKanIScelsiteA  | SMR12484 x P1 (SMR10777)                                          |
| SMR12487           | FC36 $\Delta araBAD567 tet2FRTcatFRT$ 3ChiKanIScelsiteA                                           | SMR12485 x pCP20                                                  |
| SMR12488           | FC36 $\Delta araBAD567 \Delta att\lambda::P_{BADI}$ -Scel <i>tet2FRTcatFRT</i> 3ChiKanIScelsiteA  | SMR12486 x pCP20                                                  |
| SMR12489           | FC36 $\Delta araBAD567 tet2FRTcatFRT$ KanIScelsiteA'                                              | SMR10797 x P1 (SMR10771)                                          |
| SMR12494           | SMR5822 <i>tet16FRTcatFRT</i>                                                                     | SMR5822 x Short homology from SMR10770 using primers P41 and P42  |
| SMR12497           | FC36 $\Delta araBAD567$ 3ChiKanIScelsiteA                                                         | SMR10772 x P1 (SMR10777)                                          |
| SMR12498           | FC36 $\Delta araBAD567 \Delta att\lambda::P_{BADI}$ -Scel 3ChiKanIScelsiteA                       | SMR10774 x P1 (SMR10777)                                          |
| SMR12505           | SMR5822 <i>tet11FRTcatFRT</i>                                                                     | SMR5822 x Short homology from SMR10770 using primers P35 and P36  |
| SMR12725           | SMR5822 3ChiKanIScelsiteD                                                                         | SMR5833 x Short homology from pBBR1MCS2 using primers P33 and P34 |
| SMR12726           | SMR5833 <i>tet8FRTcatFRT</i>                                                                      | SMR5833 x Short                                                   |

| Plasmid/<br>Strain | Relevant Genotype                                                                                                                                         | Reference or<br>Source                                           |
|--------------------|-----------------------------------------------------------------------------------------------------------------------------------------------------------|------------------------------------------------------------------|
|                    |                                                                                                                                                           | homology from SMR10770 using primer P29 and P30                  |
| SMR12728           | SMR4562 KanI Scel site B'                                                                                                                                 | SMR5833 x Short homology from pBBR1MCS2 using primer P59 and P60 |
| SMR12729           | FC36 $\Delta$ araBAD567 tet10FRTcatFRT 3ChiKanI Scel site D                                                                                               | SMR11787 x P1 (SMR12725)                                         |
| SMR12730           | FC36 $\Delta$ araBAD567 $\Delta$ att $\lambda$ ::P <sub>BADl</sub> -Scel tet10FRTcatFRT 3ChiKanI Scel site D                                              | SMR11788 x P1 (SMR12725)                                         |
| SMR12731           | FC36 $\Delta$ araBAD567 3ChiKanI Scel site A tet8FRTcatFRT                                                                                                | SMR12497 x P1 (SMR12726)                                         |
| SMR12732           | FC36 $\Delta$ araBAD567 $\Delta$ att $\lambda$ ::P <sub>BADl</sub> -Scel 3ChiKanI Scel site A tet8FRTcatFRT                                               | SMR12498 x P1 (SMR12726)                                         |
| SMR12735           | FC36 $\Delta$ araBAD567 tet14FRTcatFRT KanI Scel site B'                                                                                                  | SMR12478 x P1 (SMR12728)                                         |
| SMR12736           | FC36 $\Delta$ araBAD567 $\Delta$ att $\lambda$ ::P <sub>BADl</sub> -Scel tet14FRTcatFRT KanI Scel site B'                                                 | SMR12479 x P1 (SMR12728)                                         |
| SMR12737           | FC36 $\Delta$ araBAD567 tet16FRTcatFRT                                                                                                                    | SMR10772 x P1 (SMR12494)                                         |
| SMR12738           | FC36 $\Delta$ araBAD567 $\Delta$ att $\lambda$ ::P <sub>BADl</sub> -Scel tet16FRTcatFRT                                                                   | SMR10774 x P1 (SMR12494)                                         |
| SMR12739           | FC36 $\Delta$ araBAD567 tet11FRTcatFRT                                                                                                                    | SMR10772 x P1 (SMR12505)                                         |
| SMR12740           | FC36 $\Delta$ araBAD567 $\Delta$ att $\lambda$ ::P <sub>BADl</sub> -Scel tet11FRTcatFRT                                                                   | SMR10774 x P1 (SMR12505)                                         |
| SMR12744           | FC36 $\Delta$ araBAD567 $\Delta$ att $\lambda$ ::P <sub>BADl</sub> -Scel tet4FRTcatFRT $\Delta$ dinB50::FRT KanFRT                                        | SMR11802 x P1 (SMR5875)                                          |
| SMR12747           | FC36 $\Delta$ araBAD567 tet16FRTcatFRT 3ChiKanI Scel site B                                                                                               | SMR12737 x P1 (SMR11763)                                         |
| SMR12748           | FC36 $\Delta$ araBAD567 $\Delta$ att $\lambda$ ::P <sub>BADl</sub> -Scel tet16FRTcatFRT 3ChiKanI Scel site B                                              | SMR12738 x P1 (SMR11763)                                         |
| SMR12749           | FC36 $\Delta$ araBAD567 3ChiKanI Scel site B tet11FRTcatFRT                                                                                               | SMR12739 x P1 (SMR11763)                                         |
| SMR12750           | FC36 $\Delta$ araBAD567 $\Delta$ att $\lambda$ ::P <sub>BADl</sub> -Scel 3ChiKanI Scel site B tet11FRTcatFRT                                              | SMR12740 x P1 (SMR11763)                                         |
| SMR12753           | FC36 $\Delta$ araBAD567 tet11FRTcatFRT KanI Scel site B'                                                                                                  | SMR12739 x P1 (SMR12728)                                         |
| SMR12754           | FC36 $\Delta$ araBAD567 $\Delta$ att $\lambda$ ::P <sub>BADl</sub> -Scel tet11FRTcatFRT KanI Scel site B'                                                 | SMR12740 x P1 (SMR12728)                                         |
| SMR12758           | FC36 $\Delta$ araBAD567 $\Delta$ att $\lambda$ ::P <sub>BADl</sub> -Scel tet4FRTcatFRT $\Delta$ dinB50::FRT                                               | SMR12744 x pCP20                                                 |
| SMR12764           | FC36 $\Delta$ araBAD567 $\Delta$ att $\lambda$ ::P <sub>BADl</sub> -Scel tet4FRTcatFRT $\Delta$ dinB50::FRT 3ChiKanI Scel site A                          | SMR12758 x P1 (SMR10777)                                         |
| SMR12794           | FC36 $\Delta$ araBAD567 $\Delta$ att $\lambda$ ::P <sub>BADl</sub> -Scel tet6FRTcatFRT $\Delta$ dinB50::FRT KanFRT                                        | SMR12444 x P1 (SMR5875)                                          |
| SMR12796           | FC36 $\Delta$ araBAD567 $\Delta$ att $\lambda$ ::P <sub>BADl</sub> -Scel tet7FRTcatFRT $\Delta$ dinB50::FRT KanFRT                                        | SMR12455 x P1 (SMR5875)                                          |
| SMR12798           | FC36 $\Delta$ araBAD567 $\Delta$ att $\lambda$ ::P <sub>BADl</sub> -Scel tet6FRTcatFRT $\Delta$ dinB50::FRT                                               | SMR12794 x pCP20                                                 |
| SMR12800           | FC36 $\Delta$ araBAD567 $\Delta$ att $\lambda$ ::P <sub>BADl</sub> -Scel tet7FRTcatFRT $\Delta$ dinB50::FRT                                               | SMR12796 x pCP20                                                 |
| SMR12801           | FC36 $\Delta$ araBAD567 $\Delta$ att $\lambda$ ::P <sub>BADl</sub> -Scel $\Delta$ polB::FRTcatFRT                                                         | Shee et al. 2011                                                 |
| SMR12810           | FC36 $\Delta$ araBAD567 $\Delta$ att $\lambda$ ::P <sub>BADl</sub> -Scel tet2FRT 3ChiKanI Scel site A $\Delta$ dinB50::FRT $\Delta$ polB::FRTcatFRT       | SMR10868 x P1 (SMR12801)                                         |
| SMR12814           | FC36 $\Delta$ araBAD567 $\Delta$ att $\lambda$ ::P <sub>BADl</sub> -Scel tet4FRTcatFRT $\Delta$ dinB50::FRT 3ChiKanI Scel site A $\Delta$ polB::FRTcatFRT | SMR12764 x P1 (SMR12801)                                         |
| SMR13124           | FC36 $\Delta$ araBAD567 $\Delta$ att $\lambda$ ::P <sub>BADl</sub> -Scel tet6FRTcatFRT $\Delta$ dinB50::FRT 3ChiKanI Scel site A                          | SMR12798 x P1 (SMR10777)                                         |
| SMR13126           | FC36 $\Delta$ araBAD567 $\Delta$ att $\lambda$ ::P <sub>BADl</sub> -Scel tet7FRTcatFRT $\Delta$ dinB50::FRT 3ChiKanI Scel site A                          | SMR12800 x P1 (SMR10777)                                         |

| Plasmid/<br>Strain | Relevant Genotype                                                                                                                               | Reference or<br>Source                                  |
|--------------------|-------------------------------------------------------------------------------------------------------------------------------------------------|---------------------------------------------------------|
| SMR13128           | FC36 $\Delta araBAD567 \Delta att\lambda::P_{BADI}$ -Scel <i>tet6FRT catFRT</i> $\Delta dinB50::FRT \Delta polB::FRT catFRT$                    | SMR12798 x P1 (SMR12801)                                |
| SMR13130           | FC36 $\Delta araBAD567 \Delta att\lambda::P_{BADI}$ -Scel <i>tet7FRT catFRT</i> $\Delta dinB50::FRT \Delta polB::FRT catFRT$                    | SMR12800 x P1 (SMR12801)                                |
| SMR13153           | FC36 $\Delta araBAD567 \Delta att\lambda::P_{BADI}$ -Scel <i>tet6FRT catFRT</i> $\Delta dinB50::FRT \Delta polB::FRT catFRT$ 3ChiKanI ScelsiteA | SMR13128 x P1 (SMR10777)                                |
| SMR13155           | FC36 $\Delta araBAD567 \Delta att\lambda::P_{BADI}$ -Scel <i>tet7FRT catFRT</i> $\Delta dinB50::FRT \Delta polB::FRT catFRT$ 3ChiKanI ScelsiteA | SMR13130 x P1 (SMR10777)                                |
| SMR14582           | FC36 $\Delta araBAD567 \Delta att\lambda::P_{BADI}$ -Scel <i>tet4FRT</i> 3ChiKanI ScelsiteA                                                     | SMR12438 x pCP20                                        |
| SMR14586           | FC36 $\Delta araBAD567 \Delta att\lambda::P_{BADI}$ -Scel <i>tet6FRT</i> 3ChiKanI ScelsiteA                                                     | SMR12448 x pCP20                                        |
| SMR14588           | FC36 $\Delta araBAD567 \Delta att\lambda::P_{BADI}$ -Scel <i>tet7FRT</i> 3ChiKanI ScelsiteA                                                     | SMR12457 x pCP20                                        |
| SMR14590           | FC36 $\Delta araBAD567 \Delta att\lambda::P_{BADI}$ -Scel <i>tet2FRT</i> 3ChiKanI ScelsiteA $\Delta dinB50::FRT \Delta umuCD::cat$              | SMR10868 x P1 (SMR3525)                                 |
| SMR14594           | FC36 $\Delta araBAD567 \Delta att\lambda::P_{BADI}$ -Scel <i>tet4FRT catFRT</i> $\Delta dinB50::FRT$ 3ChiKanI ScelsiteA $\Delta umuCD::cat$     | SMR12764 x P1 SMR3525                                   |
| SMR14598           | FC36 $\Delta araBAD567 \Delta att\lambda::P_{BADI}$ -Scel <i>tet6FRT catFRT</i> $\Delta dinB50::FRT$ 3ChiKanI ScelsiteA $\Delta umuCD::cat$     | SMR13124 x P1 (SMR3525)                                 |
| SMR14600           | FC36 $\Delta araBAD567 \Delta att\lambda::P_{BADI}$ -Scel <i>tet7FRT catFRT</i> $\Delta dinB50::FRT$ 3ChiKanI ScelsiteA $\Delta umuCD::cat$     | SMR13126 x P1 (SMR3525)                                 |
| SMR14616           | FC36 $\Delta araBAD567 \Delta att\lambda::P_{BADI}$ -Scel $\Delta recD::FRT$ 3ChiKanI ScelsiteA                                                 | SMR10828 x P1 (SMR10777)                                |
| SMR14618           | FC36 $\Delta araBAD567 \Delta att\lambda::P_{BADI}$ -Scel <i>tetRtetA+1FRT catFRT (tet1)</i> $\Delta recD::FRT$ 3ChiKanI ScelsiteA              | SMR14616 x P1 (SMR10896)                                |
| SMR14620           | FC36 $\Delta araBAD567 \Delta att\lambda::P_{BADI}$ -Scel $\Delta recD::FRT$ 3ChiKanI ScelsiteA <i>tet3FRT catFRT</i>                           | SMR14616 x P1 (SMR10782)                                |
| SMR14622           | FC36 $\Delta araBAD567 \Delta att\lambda::P_{BADI}$ -Scel $\Delta recD::FRT$ 3ChiKanI ScelsiteA <i>tet4FRT catFRT</i>                           | SMR14616 x P1 (SMR11785)                                |
| SMR14624           | FC36 $\Delta araBAD567 \Delta att\lambda::P_{BADI}$ -Scel $\Delta recD::FRT$ 3ChiKanI ScelsiteA <i>tet5FRT catFRT</i>                           | SMR14616 x P1 (SMR12439)                                |
| SMR14626           | FC36 $\Delta araBAD567 \Delta att\lambda::P_{BADI}$ -Scel $\Delta recD::FRT$ 3ChiKanI ScelsiteA <i>tet6FRT catFRT</i>                           | SMR14616 x P1 (SMR12440)                                |
| SMR14628           | FC36 $\Delta araBAD567 \Delta att\lambda::P_{BADI}$ -Scel $\Delta recD::FRT$ ChiKanI ScelsiteA <i>tet7FRT catFRT</i>                            | SMR14616 x P1 (SMR12453)                                |
| SMR14630           | FC36 $\Delta araBAD567 \Delta att\lambda::P_{BADI}$ -Scel $\Delta recD::FRT$ ChiKanI ScelsiteA <i>tet8FRT catFRT</i>                            | SMR14616 x P1 (SMR12726)                                |
| SMR14632           | FC36 $\Delta araBAD567 \Delta att\lambda::P_{BADI}$ -Scel $\Delta recD::FRT$ 3ChiKanI ScelsiteA <i>tet9FRT catFRT</i>                           | SMR14616 x P1 (SMR11694)                                |
| SMR14684           | FC36 $\Delta araBAD567 \Delta att\lambda::P_{BADI}$ -Scel <i>tet2FRT</i> 3ChiKanI ScelsiteA $\Delta umuCD::cat$                                 | SMR10866 x P1 (SMR3525)                                 |
| SMR14586           | FC36 $\Delta araBAD567 \Delta att\lambda::P_{BADI}$ -Scel <i>tet6FRT</i> 3ChiKanI ScelsiteA                                                     | SMR12448 x pCP20                                        |
| SMR14588           | FC36 $\Delta araBAD567 \Delta att\lambda::P_{BADI}$ -Scel <i>tet7FRT</i> 3ChiKanI ScelsiteA                                                     | SMR12457 x pCP20                                        |
| SMR14688           | FC36 $\Delta araBAD567 \Delta att\lambda::P_{BADI}$ -Scel <i>tet4FRT</i> 3ChiKanI ScelsiteA $\Delta umuCD::cat$                                 | SMR14582 x P1 (SMR3525)                                 |
| SMR14692           | FC36 $\Delta araBAD567 \Delta att\lambda::P_{BADI}$ -Scel <i>tet6FRT</i> 3ChiKanI ScelsiteA $\Delta umuCD::cat$                                 | SMR14586 x P1 (SMR3525)                                 |
| SMR14694           | FC36 $\Delta araBAD567 \Delta att\lambda::P_{BADI}$ -Scel <i>tet7FRT</i> 3ChiKanI ScelsiteA $\Delta umuCD::cat$                                 | SMR14588 x P1 (SMR3525)                                 |
| SMR16374           | FC36 $\Delta araBAD567 \Delta att\lambda::P_{BADI}$ -Scel $\Delta recD::FRT$ KanFRT                                                             | SMR 10774 x P1 JW2787                                   |
| SMR16392           | FC36 $\Delta araBAD567 \Delta att\lambda::P_{BADI}$ -Scel $\Delta recD::FRT$                                                                    | SMR16374 x pCP20                                        |
| SMR16673           | MG1655 FRT KanFRT IScelsiteE                                                                                                                    | SMR6233x Short homology from pKD4 using primers P47-P48 |
| SMR16674           | MG1655 FRT KanFRT IScelsiteF                                                                                                                    | SMR6233x Short homology from pKD4 using primers P49-P50 |

| Plasmid/<br>Strain | Relevant Genotype                                                                                               | Reference or<br>Source                                           |
|--------------------|-----------------------------------------------------------------------------------------------------------------|------------------------------------------------------------------|
| SMR16675           | MG1655 FRTKanFRTIScelsiteG                                                                                      | SMR6233x Short<br>homology from<br>pKD4 using primers<br>P50-P52 |
| SMR16700           | MG1655 FRTKanFRTIScelsiteH                                                                                      | SMR6233x Short<br>homology from<br>pKD4 using primers<br>P53-P54 |
| SMR16701           | MG1655 FRTKanFRTIScelsitel                                                                                      | SMR6233x Short<br>homology from<br>pKD4 using primers<br>P55-P56 |
| SMR16729           | FC36 $\Delta araBAD567 \Delta att\lambda::P_{BADI}-Scel tet13FRTcatFRT$<br>FRTKanFRTIScelsiteE                  | SMR11774 x P1<br>(SMR16673)                                      |
| SMR16731           | FC36 $\Delta araBAD567 \Delta att\lambda::P_{BADI}-Scel tet13FRTcatFRT$<br>FRTKanFRTIScelsiteF                  | SMR11774 x P1<br>(SMR16674)                                      |
| SMR16733           | FC36 $\Delta araBAD567 \Delta att\lambda::P_{BADI}-Scel tet13FRTcatFRT$<br>FRTKanFRTIScelsiteG                  | SMR11774 x P1<br>(SMR16675)                                      |
| SMR16735           | FC36 $\Delta araBAD567 \Delta att\lambda::P_{BADI}-Scel tet13FRTcatFRT$<br>FRTKanFRTIScelsiteH                  | SMR11774 x P1<br>(SMR16700)                                      |
| SMR16737           | FC36 $\Delta araBAD567 \Delta att\lambda::P_{BADI}-Scel tet13FRTcatFRT$<br>FRTKanFRTIScelsitel                  | SMR11774 x P1<br>(SMR16701)                                      |
| SMR16739           | FC36 $\Delta araBAD567 \Delta att\lambda::P_{BADI}-Scel \Delta recD::FRT tet13FRTcatFRT$                        | SMR16392 x P1<br>(SMR11769)                                      |
| SMR16746           | FC36 $\Delta araBAD567 \Delta att\lambda::P_{BADI}-Scel \Delta recD::FRT tet13FRTcatFRT$<br>FRTKanFRTIScelsiteE | SMR16739 x P1<br>(SMR16673)                                      |
| SMR16748           | FC36 $\Delta araBAD567 \Delta att\lambda::P_{BADI}-Scel \Delta recD::FRT tet13FRTcatFRT$<br>FRTKanFRTIScelsiteF | SMR16739 x P1<br>(SMR16674)                                      |
| SMR16750           | FC36 $\Delta araBAD567 \Delta att\lambda::P_{BADI}-Scel \Delta recD::FRT tet13FRTcatFRT$<br>FRTKanFRTIScelsiteG | SMR16739 x P1<br>(SMR16675)                                      |
| SMR16752           | FC36 $\Delta araBAD567 \Delta att\lambda::P_{BADI}-Scel \Delta recD::FRT tet13FRTcatFRT$<br>FRTKanFRTIScelsiteH | SMR16739 x P1<br>(SMR16700)                                      |
| SMR16754           | FC36 $\Delta araBAD567 \Delta att\lambda::P_{BADI}-Scel \Delta recD::FRT tet13FRTcatFRT$<br>FRTKanFRTIScelsitel | SMR16739 x P1<br>(SMR16701)                                      |

\**E. coli* strains and plasmids were constructed using standard P1 transduction, transformation (Miller, 1992), lysogenization (Gumbiner-Russo et al., 2001), recombinant DNA (Sambrook and Russell, 2001) and short-homology recombineering methods (Datsenko and Wanner, 2000). Sequencing was performed by SeqWright DNA Technology Services (Houston, TX).



**Table S2. Names and Locations of New I-Sites and *tet* Alleles**

| Short allele name used in text and figures | Allele description*                   | Minute position | Insertion/deletion site† |
|--------------------------------------------|---------------------------------------|-----------------|--------------------------|
| I-site A                                   | <i>zie3920.5::3ChiKanIScelsiteA</i>   | ~84.2'          | 3920551 - 3920571        |
| I-site A'                                  | <i>zie3920.5'::KanIScelsiteA'</i>     | ~84.2'          | 3920551 - 3920571        |
| I-site B                                   | <i>zfd2513.5::3ChiKanIScelsiteB</i>   | ~53.99'         | 2513573 - 2513593        |
| I-site B'                                  | <i>zfd2513.5'::KanIScelsiteB'</i>     | ~53.99'         | 2513573 - 2513593        |
| I-site C                                   | <i>zie3936.8::3ChiKanIScelsiteC</i>   | ~84.55'         | 3936888 - 3936907        |
| I-site D                                   | <i>zdd1542.3::3ChiKanIScelsiteD</i>   | ~33.12'         | 1542348 - 1542374        |
| I-site E                                   | <i>zif3960.3::FRTKanFRTIScelsiteE</i> | ~85.06'         | 3960326 - 3960337        |
| I-site F                                   | <i>zif3981.8::FRTKanFRTIScelsiteF</i> | ~85.54'         | 3981825 - 3981831        |
| I-site G                                   | <i>zig4005.9::FRTKanFRTIScelsiteG</i> | ~86.05'         | 4005988 - 4006012        |
| I-site H                                   | <i>zih4077.5::FRTKanFRTIScelsiteH</i> | ~87.58'         | 4077589 - 4077599        |
| I-site I                                   | <i>zii4124.8::FRTKanFRTIScelsiteI</i> | ~88.6'          | 4124854 - 4124874        |
| <i>tet1</i>                                | <i>zie3920.3::tetRtetA+1FRTcatFRT</i> | ~84.2'          | 3920355 - 3920375        |
| <i>tet2</i>                                | <i>zie3913.1::tetRtetA+1FRT</i>       | ~84.06'         | 3913117 - 3913122        |
| <i>tet2'</i>                               | <i>zie3913.1'::tetRtetA+1FRT</i>      | ~84.06'         | 3913117 - 3913122        |
| <i>tet2a</i>                               | <i>zie3913.1::tetRtetA+1FRTcatFRT</i> | ~84.06'         | 3913117 - 3913122        |
| <i>tet3</i>                                | <i>zid3892.8::tetRtetA+1FRTcatFRT</i> | ~83.6'          | 3892884 - 3892891        |
| <i>tet4</i>                                | <i>zic3858.9::tetRtetA+1FRTcatFRT</i> | ~82.88'         | 3858910 - 3858939        |
| <i>tet5</i>                                | <i>zic3829.8::tetRtetA+1FRTcatFRT</i> | ~82.25'         | 3829822 - 3829836        |
| <i>tet6</i>                                | <i>zib3786.6::tetRtetA+1FRTcatFRT</i> | ~81.3'          | 3786668 - 3786676        |
| <i>tet7</i>                                | <i>zhi3661.4::tetRtetA+1FRTcatFRT</i> | ~78.65'         | 3661454 - 3661477        |
| <i>tet8</i>                                | <i>zhc3388.1::tetRtetA+1FRTcatFRT</i> | ~72.78'         | 3388124 - 3388141        |
| <i>tet9</i>                                | <i>zfd2509.2::tetRtetA+1FRTcatFRT</i> | ~53.9'          | 2509244 - 2509256        |
| <i>tet10</i>                               | <i>zdc1532.9::tetRtetA+1FRTcatFRT</i> | ~32.92'         | 1532951 - 1532970        |
| <i>tet11</i>                               | <i>zfd2502.5::tetRtetA+1FRTcatFRT</i> | ~53.75'         | 2502502 - 2502528        |
| <i>tet12</i>                               | <i>zfd2474.4::tetRtetA+1FRTcatFRT</i> | ~53.15'         | 2474465 - 2474539        |
| <i>tet13</i>                               | <i>zie3954.5::tetRtetA+1FRTcatFRT</i> | ~84.94'         | 3954539 - 3954562        |
| <i>tet14</i>                               | <i>zfe2523.9::tetRtetA+1FRTcatFRT</i> | ~54.22'         | 2523923 - 2523949        |
| <i>tet15</i>                               | <i>zfe2547.5::tetRtetA+1FRTcatFRT</i> | ~54.72'         | 2547597 - 2547638        |
| <i>tet16</i>                               | <i>zff2572.2::tetRtetA+1FRTcatFRT</i> | ~55.25'         | 2572275 - 2572296        |
| <i>tet17</i>                               | <i>zie3927.2::tetRtetA+1FRTcatFRT</i> | ~84.35'         | 3927225 - 3927226        |

\* Insertion sites named according to nomenclature for insertions not within a particular gene (Chumley et al., 1979).

† I-SceI cutsites (I-sites) and *tet* alleles were inserted, deleting base pairs between coordinates shown, using phage λ Red-mediated short-homology recombineering methods (Datsenko and Wanner, 2000) with donor template sequences and steps outlined in **Supplementary Table 1**.

**Table S3. PCR Primers**

| Primer | Sequence (5' - 3')                                                                                | Strain   | Cassette    | Allele           | Deletion coordinates (Minute position) |
|--------|---------------------------------------------------------------------------------------------------|----------|-------------|------------------|----------------------------------------|
| P1     | CCGTTTCCATTTAGGTGGGTAC<br>GTTGGAGCCGCATTATTTTGTGT<br>AGGCTGGAGCTGCTT                              | SMR10770 | <i>tetA</i> |                  |                                        |
| P2     | CTTCACGGTAACCAAGATGTCG<br>AGTTAACCACCCTTTAGACATAT<br>GAATATCCTCCTTAG                              |          |             |                  |                                        |
| P3     | ACTGGTTACATTTAACGCCACGT<br>TCACTCTTTTGCATCAACAAGAG<br>CTGGTGGGCTGGTGGCTGGTG<br>GGGATGAATGTCAGCTAC | SMR10777 | l-site A    | <i>zie3920.5</i> | 3920551 - 3920571<br>(~84.2')          |
| P4     | CGATTTTTAGCAGACTGATATTT<br>TCACTAATGACTTATTTTCTGCA<br>TTACCCTGTTATCCCTACGAAAT<br>CTCGTGATGGCAGG   |          |             |                  |                                        |
| P5     | GCCAGTCTGGAAACAGGCTGGC<br>TTTTTTTTGCGCGTGTGCCGTTT<br>CCATTTAGGTGGGTA                              | SMR10796 | <i>tet2</i> | <i>zie3913.1</i> | 3913117 - 3913122<br>(~84.06')         |
| P6     | GGTTTTATATCAGCAGGATCTAT<br>GTGAACGCTATTCAGGCGCGGA<br>ATAACATCATTGGT                               |          |             |                  |                                        |
| P7     | CTGTTTTTAGACTGAAATATCAT<br>AAACTTGCAAAGGCATCCCGTTT<br>CCATTTAGGTGGGT                              | SMR10896 | <i>tet1</i> | <i>zie3920.3</i> | 3920355 - 3920375<br>(~84.2')          |
| P8     | GCGTGCTTCAGATCACATATTG<br>CGCATGTTGCGCACAGCCGCG<br>GAATAACATCATTGG                                |          |             |                  |                                        |
| P9     | GAAGATTGTCTTTATCGACGCTC<br>ACTAAAATCGATAGCGCCCGTTT<br>CCATTTAGGTGGGT                              | SMR10782 | <i>tet3</i> | <i>zid3892.8</i> | 3892884 - 3892891<br>(~83.6')          |
| P10    | GATCTAAATAAAAAACCCGCCA<br>GCAATCATGCATGGCGGGCGC<br>GGAATAACATCATTGG                               |          |             |                  |                                        |
| P11    | GGTTAATGAGTCAGCAAGTGGC<br>GGTGAAAAACTGGTCGTGGAC<br>GCCGTTTCCATTTAGG TGGGTA                        | SMR11785 | <i>tet4</i> | <i>zic3858.9</i> | 3858910 - 3858939<br>(~82.88')         |
| P12    | CGACCGAGGCGCTCGGTACCG<br>TTTTCGACAACGTAATCGCCTGC<br>CCGCGGAATAACATCATTGGT                         |          |             |                  |                                        |
| P13    | CCTCAAGGGAATGCGCTGACAA<br>ATACGTTGTAATCTATTGATGGA<br>CCGTTTCCATTTAGGTGGGTA                        | SMR12439 | <i>tet5</i> | <i>zic3829.8</i> | 3829822 - 3829836<br>(~82.25')         |
| P14    | CGACGGAGCCGGTGCGGTA<br>CATCAATCTCGCCGGTACGAC<br>TCCGCGGAATAACATCATTGGT                            |          |             |                  |                                        |
| P15    | CGGTCGCACCATCGCATTACGC<br>GTAGCGCCTTTAATTTGCGCTA<br>GCCGTTTCCATTTAGGTGGGTA                        | SMR12440 | <i>tet6</i> | <i>zib3786.6</i> | 3786668 - 3786676<br>(~81.3')          |
| P16    | TCCAGCATCAGTGGCAAGGCTG<br>GGGCAAACAGCCCGAAGCGGC<br>GACGCGGAATAACATCATTGG<br>T                     |          |             |                  |                                        |
| P17    | CATATTTGTCATTTGAATATTGG<br>TCAGGATCTCACACCTGCTTCA<br>CCGTTTCCATTTAGGTGGGTA                        | SMR12453 | <i>tet7</i> | <i>zhi3661.4</i> | 3661454 - 3661477<br>(~78.65')         |
| P18    | ACCGCCTGGCAAACGCGAAAG<br>AGAAGTAGCCGGTAGCCCGCA                                                    |          |             |                  |                                        |

| Primer | Sequence (5' - 3')                                                                                 | Strain   | Cassette     | Allele           | Deletion coordinates (Minute position) |
|--------|----------------------------------------------------------------------------------------------------|----------|--------------|------------------|----------------------------------------|
|        | GCGCGGAATAACATCATTGGT                                                                              |          |              |                  |                                        |
| P19    | CAGCCTTCACGATAGCCACGCT<br>CATACGCTTTACGCTTACCGTTT<br>CCATTTAGGTGGGTA                               | SMR11694 | <i>tet9</i>  | <i>zfd2509.2</i> | 2509244 - 2509256<br>(~53.9')          |
| P20    | GGCGCAAAAACCGTTGGTGGCG<br>TCATGATAATGGCTACCCGCGG<br>AATAACATCATTGGT                                |          |              |                  |                                        |
| P21    | CCATAAGCGCTAACTTAAGGGT<br>TGAACCATCTGAAGAATGCGAC<br>GGCTGGTGGGCTGGTGGGCTG<br>GTGGGGATGAATGTCAGCTAC | SMR11763 | I-site B     | <i>zfd2513.5</i> | 2513573 - 2513593<br>(~53.99')         |
| P22    | GTATCCCTGACAGCCTACAAA<br>CGCAATTGAAGAACGCGAGGCA<br>TATTACCCTGTTATCCCTACGAA<br>ATCTCGTGATGGCAGG     |          |              |                  |                                        |
| P23    | CTTGAAGCAGCAGGGGATTGAT<br>TGGAATGGTGTTTTTTAGATGTG<br>AGAAATATTTACCCCGTTTCC<br>ATTTAGGTGGGTA        | SMR12449 | <i>tet12</i> | <i>zfd2474.4</i> | 2474465 - 2474539<br>(~53.15')         |
| P24    | ACCTTCATCTATGACCGATTAA<br>GTCAGGCGACCTGCCAAAAGCC<br>AAAGTTATCCACGGGCGCGGAA<br>TAACATCATTGGT        |          |              |                  |                                        |
| P25    | GCTTAGATTTACGCTGTCTTTTG<br>ATCAAATTATTACCATCGGTTGG<br>CTGGTGGGCTGGTGGGCTGGT<br>GGGGATGAATGTCAGCTAC | SMR11768 | I-site C     | <i>zie3936.8</i> | 3936888 - 3936907<br>(~84.55')         |
| P26    | CTATACGTTTTATCACAATGGGCA<br>TTATTACTGTTGCTTCAGCAGCA<br>TTACCCTGTTATCCCTACGAAAT<br>CTCGTGATGGCAGG   |          |              |                  |                                        |
| P27    | GGTTAGGGAAAAATGCCTGATA<br>GCGCTTCGCTTATCAGGCCTAC<br>CCCGTTTCCATTTAGGTGGGTA                         | SMR11769 | <i>tet13</i> | <i>zie3954.5</i> | 3954539 - 3954562<br>(~84.94')         |
| P28    | CGGCTACATGAGCCGCTAATTG<br>AGGCATTCTGGAAGATTTTGCC<br>GCGCGGAATAACATCATTGGT                          |          |              |                  |                                        |
| P29    | GTGCACGAACGGTCCCCTCGCC<br>CCTTTGGGGTGAGGGTTACCGT<br>TTCCATTTAGGTGGGT                               | SMR12726 | <i>tet8</i>  | <i>zhc3388.1</i> | 3388124 - 3388141<br>(~72.78')         |
| P30    | GTAATTCATATTGTAAGTACG<br>TTGTACAAACCTGTGCCCGCGG<br>AATAACATCATTGG                                  |          |              |                  |                                        |
| P31    | GCCGAATGGGCAATTGAACCT<br>GAAACCGTTGTCTGATGCGCTT<br>CCCGTTTCCATTTAGGTGGGTA                          | SMR11784 | <i>tet10</i> | <i>zdc1532.9</i> | 1532951 - 1532970<br>(~32.92')         |
| P32    | GGTTGCCGGATGCGGCGTAAAC<br>GCCTTATCCGGCATAACATTAGC<br>CCGCGGAATAACATCATTGGT                         |          |              |                  |                                        |
| P33    | CCTTTTTAGTGAATAAATCATCA<br>CTAATTCTATAAGTGTCTGGTCG<br>CTGGTGGGCTGGTGGGCTGGT<br>GGGGATGAATGTCAGCTAC | SMR12725 | I-site D     | <i>zdd1542.3</i> | 1542348-1542374<br>(~33.12')           |
| P34    | GAACGTATGTCATGTTTCAACCC<br>TTCAGATCGTGAATCTAAAGGG<br>ATTACCCTGTTATCCCTACGAAA<br>TCTCGTGATGGCAGG    |          |              |                  |                                        |
| P35    | CGTGAGACGGTTGTTCAACTGA<br>CGGATTTACAGATGATCTCCCGTT                                                 | SMR12505 | <i>tet11</i> | <i>zfd2502.5</i> | 2502502-2502528<br>(~53.75')           |

| Primer | Sequence (5' - 3')                                                                              | Strain   | Cassette     | Allele            | Deletion coordinates (Minute position) |
|--------|-------------------------------------------------------------------------------------------------|----------|--------------|-------------------|----------------------------------------|
|        | TCCATTTAGGTGGGT                                                                                 |          |              |                   |                                        |
| P36    | GCATGTAGACCGTTAGGCAAAG<br>GACAGAGAAATTGAATCGCGCG<br>GAATAACATCATTGG                             |          |              |                   |                                        |
| P37    | GACCAGGGCAATGCGCTAATGG<br>CTGGGCGGGAAGGGGATCCGT<br>TGTATCAGATATAGAGTCCGTTT<br>CCATTTAGGTGGGTA   | SMR12450 | <i>tet14</i> | <i>zfe2523.9</i>  | 2523923-2523949<br>(~54.22')           |
| P38    | CGAAGATTTTTACCAGGATGCG<br>ATAATCTACTCCATCAAATTTAA<br>CTTCTGATTGATTACCGCGGAAT<br>AACATCATTGGT    |          |              |                   |                                        |
| P39    | CCGTCGCTGGACAAGTTGATGG<br>CGCTGTAAGCGTTTCTGATTCAT<br>TGATTAAGGCCAGGCCGTTTC<br>CATTAGGTGGGTA     | SMR12459 | <i>tet15</i> | <i>zfe2547.5</i>  | 2547597-2547638<br>(~54.72')           |
| P40    | GAATTAGCACGATTTTCGTAGGC<br>CGGATAAGGCGTTCACGCCGCA<br>TCCGGCGTGTACAACGCGCGGA<br>ATAACATCATTGGT   |          |              |                   |                                        |
| P41    | CAATCCCTATGAAAGATTTTCATC<br>ACCGAAGCATGGCTAAGCCGTT<br>TCCATTTAGGTGGGT                           | SMR12494 | <i>tet16</i> | <i>zff2572.2</i>  | 2572275-2572296<br>(~55.25')           |
| P42    | GCGTCAGGCGACTGTCCGCAG<br>GGAGATGGATCTCTGCGCCCGC<br>GGAATAACATCATTGG                             |          |              |                   |                                        |
| P43    | GCCAGTCTGGAACAGGCTGGC<br>TTTTTTTTGCGCGTGTGCGCGG<br>AATAACATCATTGGT                              | SMR12480 | <i>tet2'</i> | <i>zie3913.1'</i> | 3913117 - 3913122<br>(~84.06')         |
| P44    | GGTTTTATATCAGCAGGATCTAT<br>GTGAACGCTATTCAGGCCGTTT<br>CCATTTAGGTGGGTA                            |          |              |                   |                                        |
| P45    | GATGTCGGTGACAGATTCGCC<br>AGGCACAACAATGCTAACCCGT<br>TTCCATTTAGGTGGGT                             | SMR10804 | <i>tet17</i> | <i>zie3927.2</i>  | 3927225 – 3927226<br>(~84.35')         |
| P46    | CTCTTCGCTGACGGCCAGCATC<br>ACATTAAGCGTATCCAGCCGCG<br>GAATAACATCATTGG                             |          |              |                   |                                        |
| P47    | CTGAAAGCGATGATGGCGGCAA<br>AACGAGGGAAATAATCAAGGCC<br>GGTGTAGGCTGGAGCTGCTTC                       | SMR16673 | I-site E     | <i>zif3960.3'</i> | 3960326-3960337<br>(~85.06')           |
| P48    | GGCCGCTGGAAGTGCATTAATG<br>AGTAAGTGCCGGATGCGATGCT<br>GATTACCCTGTTATCCCTACATA<br>TGAATATCCTCCTTAG |          |              |                   |                                        |
| P49    | CATGCGCATTTGCTGGTGGTGA<br>GTAAGTAGAAATCGGCGGCCGC<br>CGTGTAGGCTGGAGCTGCTTC                       | SMR16674 | I-site F     | <i>zif3981.8'</i> | 3981825-3981831<br>(~85.54')           |
| P50    | CGATCATGTAGGCCGGATAAGG<br>CGTTTACGCCGCATCCGGCAAT<br>CATTACCCTGTTATCCCTACATA<br>TGAATATCCTCCTTAG |          |              |                   |                                        |
| P51    | GCGTTATTTGCCGATTTGGCA<br>TTCATTTGATTATTTGCGGGTGA<br>GTGTAGGCTGGAGCTGCTTC                        | SMR16675 | I-site G     | <i>zig4005.9'</i> | 4005988-4006012<br>(~86.05')           |
| P52    | CATGCGTGAAAAATAATGTCCG<br>ATGCGGGCTAAACGCCTTATCC<br>GATTACCCTGTTATCCCTACATA<br>TGAATATCCTCCTTAG |          |              |                   |                                        |

| Primer | Sequence (5' - 3')                                                                                | Strain   | Cassette  | Allele            | Deletion coordinates<br>(Minute position) |
|--------|---------------------------------------------------------------------------------------------------|----------|-----------|-------------------|-------------------------------------------|
| P53    | GAATGGTAATGGGAAAAAATGA<br>TGTCATCAGATTGCTGACAAC<br>GGTGTAGGCTGGAGCTGCTTC                          | SMR16700 | I-site H  | <i>zih4077.5'</i> | 4077589-4077599<br>(~87.58')              |
| P54    | ACGACTTTGTAGGCCGGATAAG<br>GCGTTCACGCCGCATCCGGCAT<br>GATTACCCTGTTATCCCTACATA<br>TGAATATCCTCCTTAG   |          |           |                   |                                           |
| P55    | GACCGGATTTCCGAAAAAAGCG<br>CCGCACGGCGCTTTTTTTGTGC<br>CGTGTAGGCTGGAGCTGCTTC                         | SMR16701 | I-site I  | <i>zii4124.8'</i> | 4124854-4124874<br>(~88.6')               |
| P56    | GCGCCACAACCTACCACGGTTCG<br>CCAAAGAATGGCCGCTGTTTTTC<br>GATTACCCTGTTATCCCTACATA<br>TGAATATCCTCCTTAG |          |           |                   |                                           |
| P57    | ACTGGTTACATTTAACGCCACGT<br>TCACTCTTTTGCATCAACAAGAG<br>GATGAATGTCAGCTA                             | SMR10771 | I-site A' | <i>zie3920.5'</i> | 3920551 – 3920571<br>(~84.2')             |
| P58    | CGATTTTATGACAGACTGATATTT<br>TCACTAATGACTTATTTTCTGCA<br>TTACCCTGTTATCCCTACGAAAT<br>CTCGTGATGGCAGG  |          |           |                   |                                           |
| P59    | CATAAGCGCTAACTTAAGGGTT<br>GAACCATCTGAAGAATGCGACG<br>GATGAATGTCAGCTAC                              | SMR12728 | I-site B' | <i>zfd2513.5'</i> | 2513573 – 2513593<br>(~53.99')            |
| P60    | GTATCCCTGACAGCCTACAAAA<br>CGCAATTGAAGAACGCGAGGCA<br>TTACCCTGTTATCCCTACGAAAT<br>CTCGTGATGGCAGG     |          |           |                   |                                           |

## Strains Used in Each Figure

**Figure 1. (B)** DSB *tet1*, SMR10901; CS *tet1*, SMR10900; DSB *tet2*, SMR10866; CS *tet2*, SMR10865; DSB *tet3*, SMR10788; CS *tet3*, SMR10787; DSB *tet4*, SMR12438; CS *tet4*, SMR12437; DSB *tet5*, SMR12446; CS *tet5*, SMR12445; DSB *tet6*, SMR12448; CS *tet6*, SMR12447; DSB *tet7*, SMR12457; CS *tet7*, SMR12456; DSB *tet8*, SMR12732; CS *tet8*, SMR12731; DSB *tet9*, SMR11725; CS *tet9*, SMR11724; DSB *tet10*, SMR11790; CS *tet10*, SMR11789. **(C)** DSB *tet2*, SMR10866;  $\Delta$ *umuC* DSB *tet2*, SMR14684;  $\Delta$ *dinB* DSB *tet2*, SMR10868;  $\Delta$ *dinB*  $\Delta$ *umuC* DSB *tet2*, SMR14590;  $\Delta$ *dinB*  $\Delta$ *polB* DSB *tet2*, SMR12810; DSB *tet4*, SMR14582;  $\Delta$ *umuC* DSB *tet4*, SMR14688;  $\Delta$ *dinB* DSB *tet4*, SMR12764;  $\Delta$ *dinB*  $\Delta$ *umuC* DSB *tet4*, SMR14594;  $\Delta$ *dinB*  $\Delta$ *polB* DSB *tet4*, SMR12814; DSB *tet6*, SMR14586;  $\Delta$ *umuC* DSB *tet6*, SMR14692;  $\Delta$ *dinB* DSB *tet6*, SMR13124;  $\Delta$ *dinB*  $\Delta$ *umuC* DSB *tet6*, SMR14598;  $\Delta$ *dinB*  $\Delta$ *polB* DSB *tet6*, SMR13153; DSB *tet7*, SMR14588;  $\Delta$ *umuC* DSB *tet7*, SMR14694;  $\Delta$ *dinB* DSB *tet7*, SMR13126;  $\Delta$ *dinB*  $\Delta$ *umuC* DSB *tet7*, SMR14600;  $\Delta$ *dinB*  $\Delta$ *polB* DSB *tet7*, SMR13155.

**Figure 2. (B)** DSB *tet9*, SMR11765; CS *tet9*, SMR11764; DSB *tet11*, SMR12750; CS *tet11*, SMR12749; DSB *tet12*, SMR12471; CS *tet12*, SMR12470. **(D)** DSB *tet14*, SMR12482; CS *tet14*, SMR12481; DSB *tet15*, SMR12477; CS *tet15*, SMR12476; DSB *tet16*, SMR12748; CS *tet16*, SMR12747. **(F)** DSB *tet10*, SMR12730; CS *tet10*, SMR12729. **(H)** DSB *tet13*, SMR11778; CS *tet13*, SMR11777. **(I)** DSB *tet17*, SMR10810; No DSB *tet17*, SMR10809; DSB *tet13*, SMR11776; No DSB *tet13*, SMR11775. **(L)** DSB *tet2*, SMR10866; No DSB *tet2*, SMR10865; DSB *tet2'*, SMR12488; No DSB *tet2'*, SMR12487.

**Figure 3. (B)** WT DSB *tet1*, SMR10901; WT DSB *tet2*, SMR10866; WT DSB *tet3*, SMR10788; WT DSB *tet4*, SMR12438; WT DSB *tet5*, SMR12446; WT DSB *tet6*, SMR12448; WT DSB *tet7*, SMR12457; WT DSB *tet8*, SMR12732; WT DSB *tet9*, SMR11725.  $\Delta$ *recD* DSB *tet1*, SMR14618;  $\Delta$ *recD* DSB *tet2*, SMR10858;  $\Delta$ *recD* DSB *tet3*, SMR14620;  $\Delta$ *recD* DSB *tet4*, SMR14622;  $\Delta$ *recD* DSB *tet5*, SMR14624;  $\Delta$ *recD* DSB *tet6*, SMR14626;  $\Delta$ *recD* DSB *tet7*, SMR14628;  $\Delta$ *recD* DSB *tet8*, SMR14630;  $\Delta$ *recD* DSB *tet9*, SMR14632. **(D)** WT DSB I-Site E, SMR16729; WT DSB I-Site F, SMR16731; WT DSB I-Site G, SMR16733; WT DSB I-Site H, SMR16735; WT DSB I-Site I, SMR16737.  $\Delta$ *recD* DSB I-Site E, SMR16746;  $\Delta$ *recD* DSB I-Site F, SMR16748;  $\Delta$ *recD* DSB I-Site G, SMR16750;  $\Delta$ *recD* DSB I-Site H, SMR16752;  $\Delta$ *recD* DSB I-Site I, SMR16754.

**Figure 4. (B)** Chi<sup>+</sup> No-DSB, SMR10799; Chi<sup>+</sup> DSB, SMR10800; Chi<sup>°</sup> No-DSB, SMR12488; Chi<sup>°</sup> DSB, SMR12489. **(D)** Chi<sup>+</sup> No-DSB, SMR12749; Chi<sup>+</sup> DSB, SMR12750; Chi<sup>°</sup> No-DSB, SMR12753; Chi<sup>°</sup> DSB, SMR12754. **(F)** Chi<sup>+</sup> No-DSB, SMR12481; Chi<sup>+</sup> DSB, SMR12482; Chi<sup>°</sup> No-DSB, SMR12735; Chi<sup>°</sup> DSB, SMR12736. All No-DSB strains are the cutsite-only control.
