# Supplementary material for: Two Mechanisms Produce Mutation Hotspots at DNA Breaks in Escherichia coli
Source: PubMed Central journal article supplement — Cell Rep. 2012 Oct 25;2(4):714–21. doi: 10.1016/j.celrep.2012.08.033 (PMC3607216; doi:10.1016/j.celrep.2012.08.033), 2012-10-25
Supplement: mmc2.pdf [file mmc2.pdf]

# Two Mechanisms Produce Mutation Hotspots at DNA Breaks in *Escherichia coli*

Chandan Shee,<sup>1</sup> Janet L. Gibson,<sup>1</sup> and Susan M. Rosenberg<sup>1,\*</sup>

<sup>1</sup>Departments of Molecular and Human Genetics, Biochemistry and Molecular Biology, Molecular Virology and Microbiology, and Dan L. Duncan Cancer Center, Baylor College of Medicine, Houston, TX 77030, USA

\*Correspondence: [smr@bcm.edu](mailto:smr@bcm.edu)

<http://dx.doi.org/10.1016/j.celrep.2012.08.033>

## SUMMARY

Mutation hotspots and showers occur across phylogeny and profoundly influence genome evolution, yet the mechanisms that produce hotspots remain obscure. We report that DNA double-strand breaks (DSBs) provoke mutation hotspots via stress-induced mutation in *Escherichia coli*. With *tet* reporters placed 2 kb to 2 Mb (half the genome) away from an I-SceI site, RpoS/DinB-dependent mutations occur maximally within the first 2 kb and decrease logarithmically to ~60 kb. A weak mutation tail extends to 1 Mb. Hotspotting occurs independently of I-site/*tet*-reporter-pair position in the genome, upstream and downstream in the replication path. RecD, which allows RecBCD DSB-exonuclease activity, is required for strong local but not long-distance hotspotting, indicating that double-strand resection and gap-filling synthesis underlie local hotspotting, and newly illuminating DSB resection *in vivo*. Hotspotting near DSBs opens the possibility that specific genomic regions could be targeted for mutagenesis, and could also promote concerted evolution (coincident mutations) within genes/gene clusters, an important issue in the evolution of protein functions.

## INTRODUCTION

Evolutionary theory assumes that mutations fall randomly in genomic space (e.g., Mayr, 1985); however, mutation hotspots, clusters, and showers occur in organisms ranging from phage to human (Drake, 2007a, 2007b), and are very probably important forces in human tumor and organismal evolution. A recent study of *Escherichia coli* genomes revealed nonrandom distributions of mutations with hot and cold zones (Martincorena et al., 2012). Spontaneous mutations in mice fall in ~30 kb showers of simultaneous multiple mutations (Drake, 2007b; Wang et al., 2007). Both chemically mutagenized yeast (Burch et al., 2011) and *E. coli* (Parkhomchuk et al., 2009) show local clusters of mutations, as do the genomes of human breast (Nik-Zainal et al., 2012) and colon (Roberts et al., 2012) cancer cells, and

chemically treated yeast (Ma et al., 2012). These and other observations (Caporale, 2006; Drake, 2007a, 2007b) indicate that the processes of mutagenesis themselves, and not just the sites in which mutations are tolerated, can be localized in genomes and are not distributed randomly.

Mutational hotspotting can promote evolution, including evolution of tumors and pathogens, in important ways. First, hotspotting mechanisms may target regions in which variability might provide a growth advantage, as in somatic hypermutation of immunoglobulin genes (Di Noia and Neuberger, 2007), pathogen contingency genes (Moxon et al., 1994), and the cancer-driving Philadelphia chromosome (Albano et al., 2010). Second, restriction of mutagenesis to small zones, even if randomly chosen, could promote high-level multiple mutations (concerted evolution) within genes without causing deleterious mutations throughout the genome (Ninio, 1996; Ponder et al., 2005; Yang et al., 2008). The evolution of new protein functions usually requires multiple base substitutions (Romero and Arnold, 2009), and how this occurs is a significant issue in protein evolution.

Although mutational hotspotting is widespread, striking, and important, the molecular mechanisms that cause hotspots remain largely obscure. Various studies have hinted that mutation hotspots might be related to DNA double-strand breaks (DSBs), but their results were open to multiple interpretations. DSB-dependent mutation was first found in *E. coli* (Harris et al., 1994; Rosenberg et al., 1994) and then in yeast (Deem et al., 2011; Hicks et al., 2010; Strathern et al., 1995; Yang et al., 2008), both caused by DNA polymerase errors during DSB repair by homologous recombination (HR). In *E. coli*, DSB repair is nonmutagenic and uses the high-fidelity DNA polymerase (pol) III (Motamedi et al., 1999) in unstressed cells, but then is switched to a mutagenic mode using error-prone DNA polymerase DinB, which causes mutations, only under stress, under the control of the general stress response (Ponder et al., 2005; Shee et al., 2011a). Two kinds of mechanisms could underlie DSB-dependent mutagenesis: one that could produce hotspots and another that would not be expected to. If the DSB repair mechanism that recruits an error-prone polymerase is localized, then mutation hotspots might be expected. If the mutagenic repair mechanism is break-induced replication (BIR), which can prime processive replication from a DSB site to the telomere (observed in yeast [reviewed by Symington and Gautier, 2011]) or the replication terminus in *E. coli* (proposed by Kuzminov, 1995, and supported by data on recombination of phage  $\lambda$  DNA by

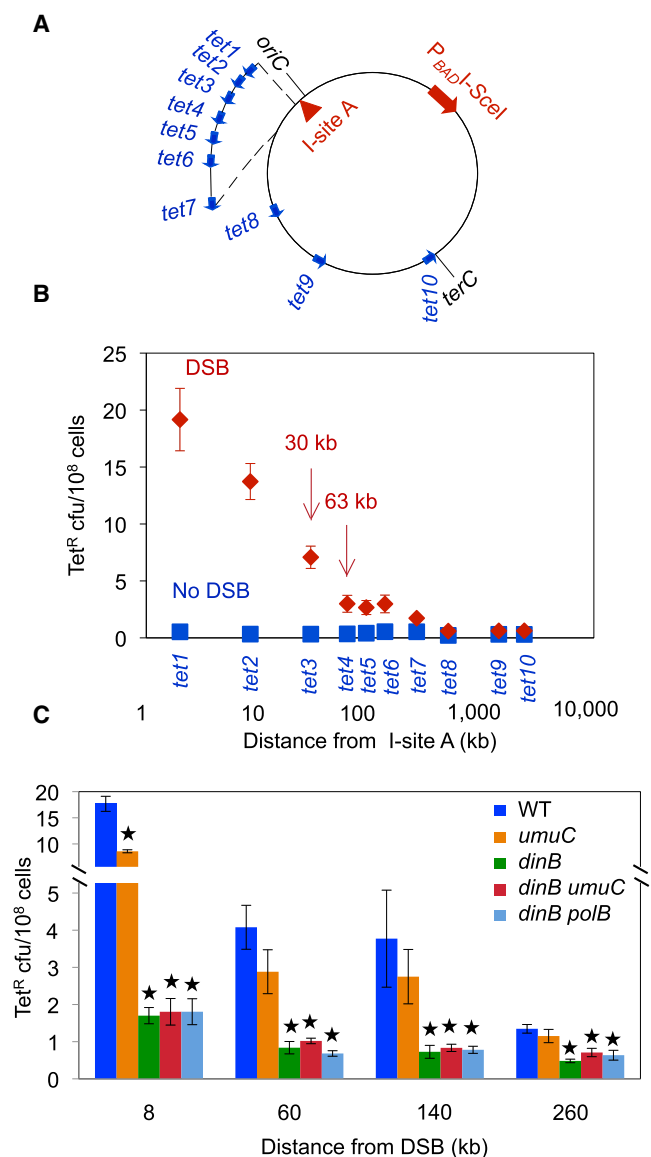

**Figure 1. DSBs Promote Strong Local and Weak Long-Distance Mutation Hotspots**

(A) Blue arrows: sites and direction of the *tet* +1 bp frameshift-mutation-reporter gene placed at various locations in the *E. coli* chromosome in different strains, one with and one without a chromosomal inducible I-SceI gene ( $P_{BAD}$ I-SceI). *oriC* and *terC*, chromosomal reference points. Approximate distances between the I-SceI outsite (I-site A) and *tet* cassettes: *tet1*, 2 kb; *tet2*, 8.5 kb; *tet3*, 29.5 kb; *tet4*, 62.5 kb; *tet5*, 92.5 kb; *tet6*, 136 kb; *tet7*, 261 kb; *tet8*, 500 kb; *tet9*, 1.4 Mb; and *tet10*, 2.4 Mb. See Tables S1, S2, and S3 for the exact chromosomal locations of each *tet* reporter and I-site, the strains that carry them, and the PCR primers used to construct them, for this and all figures.

(B) Mutant frequency is highest near the I-site and decreases logarithmically to ~60 kb from the DSB. A weak but significant hotspot extends from ~60 kb to 1 Mb (see text). DSB (◆) and No-DSB (I-SceI outsite-only control, ■) strains for each *tet* allele are indicated. Points show the mean  $\pm$  SEM for three or more independent experiments.

(C) DinB is required for strong DSB local and weak long-distance hotspotting. Each genotype has a null mutation in the gene(s) indicated. *dinB* encodes DinB/DNA Pol IV; *umuC*, an essential subunit of DNA Pol V; *polB*, DNA Pol II.

Motamedi et al., 1999), then DSB-dependent mutagenesis might affect whole chromosome arms and not form hotspots. In the sole study to address this question to date, Deem et al. (2011) found robust mutagenesis in yeast as far away from a DSB site as they assayed (36 kb), in repair reactions that could proceed only by BIR and thus would not be expected to form hotspots. By contrast, DSBs were proposed as an explanation for the particular symmetrical patterns of mutations found in ~100 kb mutation clusters in human cancer genomes and chemically mutagenized yeast (Nik-Zainal et al., 2012; Roberts et al., 2012), although as noted (Nik-Zainal et al., 2012), other repair/mutation mechanisms might be responsible.

Here we show that DSBs tightly focus stress-inducible mutations to small zones or hotspots in the *E. coli* chromosome. We show two kinds of hotspots: strong local hotspots that occur up to ~60 kb away from a DSB, and weak long-distance hotspots that extend to ~1 Mb away. Moreover, we show that the strong local and weak long-distance hotspots occur by distinct mechanisms. The data indicate that one way by which mutation hotspots can occur is via mechanisms that couple mutagenesis to DSB repair, and illuminate the molecular basis of one of those mechanisms.

## RESULTS

### Mutations Focused in Hotspots near DSBs

We constructed a movable *tet* +1 bp mutation-reporter gene cassette that reverts to wild-type (WT) function, and confers tetracycline resistance, by a -1 bp deletion mutation (Shee et al., 2011a). We used the movable *tet* reporter to construct strains with this cassette inserted at ten different sites between 2 kb and 2.4 MB away from an I-SceI double-strand endonuclease (restriction) site (I-site A, *tet1*-*tet10* cassettes; Figure 1A). Each *tet* cassette resides in two different strains, one with and one without the I-SceI-endonuclease-encoding gene cloned under a regulatable promoter in the *E. coli* chromosome. Thus, each strain pair reports on tetracycline-resistant ( $Tet^R$ ) mutant frequencies in a cell with and without an I-SceI-induced DSB in the same DNA molecule as the *tet* reporter. These breaks are repaired by HR with either an uncleaved sister chromosome (present in ~40% of starving *E. coli*; Akerlund et al., 1995) or an uncleaved spontaneous tandem DNA duplication (present in  $\sim 10^{-3}$  of cells; reviewed in Rosenberg et al., 2012). We measured reversion in starvation-stressed cells as previously described (Shee et al., 2011a), under conditions in which the formation of nearby mutations (at *tet2*; Figure 1A) requires the RpoS and SOS stress responses, DinB error-prone DNA polymerase, and HR/DSB-repair enzymes RecBC, RecA, and RuvABC, and the mutations arise in acts of DSB repair (Ponder et al., 2005; Shee et al., 2011a). Although the *tet* reporter used here captures frameshift or indel (insertion/deletion) mutations, base substitutions are also promoted (Shee et al., 2011a) and outnumber (Petrosino et al., 2009) indels in DSB-dependent stress-induced mutagenesis. Thus,

\*Significantly different from the WT strain at the same distance ( $p \geq 0.05$ ). Error bars represent 1 SEM for  $n = 3$  experiments.

See also Figure S1.

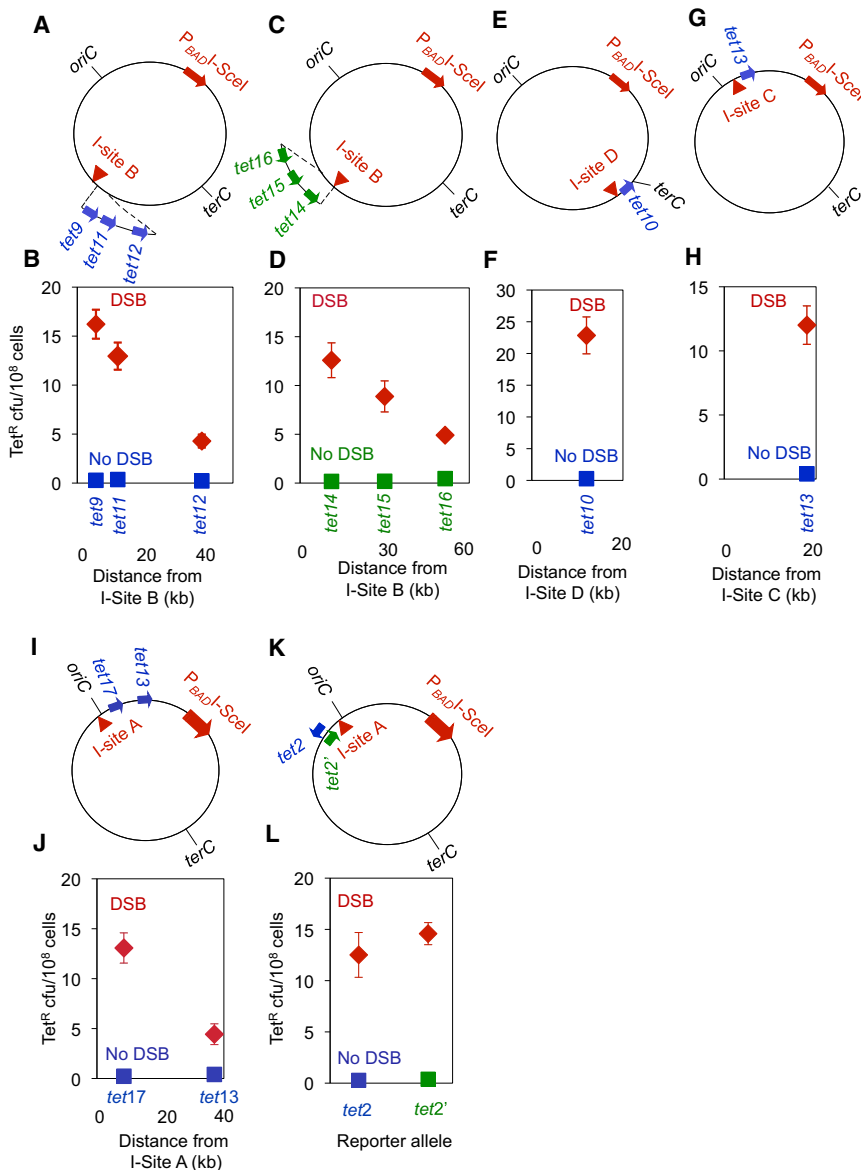

**Figure 2. Mutation Hotspots at DSBs Reflect Distance from the DSB Independently of Chromosomal Location**

(A, C, E, G, I, and K) Diagrams of the constructs used. Symbols as in Figure 1A.

(B) *oriC*-distal I-site B promotes a strong local mutation hotspot downstream in the replicore at *tet9*, *tet11*, and *tet12*, 6 kb, 13 kb, and 40 kb away.

(D) I-site B promotes a strong local hotspot upstream in the replicore at *tet14*, *tet15*, and *tet16*, 12 kb, 35 kb, and 60 kb upstream.

(F) Mutation at *tet10* near the replication terminus (*terC*) is activated  $108 \pm 29$ -fold by I-site D cleavage 12 kb away.

(H) I-site C cleavage activates mutation at *tet13*, 18 kb downstream in the right replicore.

(J) Hotspots cross the replication origin. I-site A stimulates mutations at nearby *tet17* and *tet13*, across *oriC* in the opposite replicore.

(L) Equal stimulation of mutation by I-site A cleavage at *tet2* (blue arrow) and *tet2'* (green arrow), 8.5 kb away in opposite transcriptional orientations.

Points show the mean  $\pm$  SEM for three or more independent experiments. For the relationship between mutant frequency and the log of the distance between *tet* reporters and I-sites, see Figure S1.

The weak long-distance DSB-dependent mutagenesis requires DinB (Figure 1C), indicating DSB-dependent DNA polymerase errors, similarly to mutagenesis close to a DSB (Ponder et al., 2005; Shee et al., 2011a; Figure 1C).

### DSBs Focus Mutations Independently of the Specific Genomic Position

Neither the specific location of the *tet* reporter genes nor I-sites in the chromosome (e.g., near the replication origin; Figure 1) causes DSB-proximal hotspotting of mutagenesis. Rather, mutational

hotspotting appears to be a general effect of the proximity of *tet* to a DSB, as follows. With I-site B placed about halfway between *oriC* and *ter*, the *tet9*, *tet11*, and *tet12* genes are activated for mutation proportionally to their proximity to the DSB (6, 13, and 40 kb, respectively; Figures 2A and 2B). At *tet9*, 6 kb from I-site B, DSBs at I-site B increased mutation  $90 \pm 19$ -fold relative to the cutsite-only no-DSB control (Figure 2B). By comparison, with DSBs at I-site A, *tet9* was almost inactive (Figures 1A and 1B). Therefore, proximity to the DSB, rather than the absolute genomic position, dictates mutability.

Neither the specific location of the *tet* reporter genes nor I-sites in the chromosome (e.g., near the replication origin; Figure 1) causes DSB-proximal hotspotting of mutagenesis. Rather, mutational hotspotting appears to be a general effect of the proximity of *tet* to a DSB, as follows. With I-site B placed about halfway between *oriC* and *ter*, the *tet9*, *tet11*, and *tet12* genes are activated for mutation proportionally to their proximity to the DSB (6, 13, and 40 kb, respectively; Figures 2A and 2B). At *tet9*, 6 kb from I-site B, DSBs at I-site B increased mutation  $90 \pm 19$ -fold relative to the cutsite-only no-DSB control (Figure 2B). By comparison, with DSBs at I-site A, *tet9* was almost inactive (Figures 1A and 1B). Therefore, proximity to the DSB, rather than the absolute genomic position, dictates mutability.

Mutations are generated both upstream and downstream of the DSB at I-site B in the chromosome's unidirectional replication paths (replicores; Figures 2A–2D). When *tet* genes are placed at three positions on either side of I-site B (in 12 different isogenic strains, one for each cutsite with and one for each cutsite without the I-SceI endonuclease), the mutant frequencies

the data obtained pertain to both base-substitution and indel mutagenesis.

Here we observed that the DSB-dependent  $\text{Tet}^R$  mutant frequency was highest at the *tet1* cassette,  $\sim 2$  kb from I-site A (Figure 1B), at which the DSBs induced  $65 \pm 14$ -fold more mutations than were observed in the cutsite-only (no-DSB) control. Mutant frequencies decreased logarithmically to  $\sim 60$  kb from the break and then gradually tapered off for up to a megabase from the break (Figure 1B). Thus, mutations localize tightly in a hotspot near the DSB site, mostly in the first 2 kb, and then fall off logarithmically to  $\sim 60$  kb. Additionally, from  $\sim 60$  kb to 1 Mb, DSBs promote mutagenesis weakly but significantly above the level observed in the no-DSB control strains (60 kb,  $8.8 \pm 2.5$ ; 90 kb,  $4.6 \pm 1.1$ ; 130 kb,  $5.6 \pm 1.6$ ; 260 kb,  $3.7 \pm 0.58$ ; 500 kb,  $2.8 \pm 0.42$ ; 1.4 Mb,  $3.0 \pm 0.51$ -fold;  $p = 0.0027, 0.0109, 0.0112, 0.00007, 0.0003, \text{ and } 0.0007$ , respectively).

Mutations are generated both upstream and downstream of the DSB at I-site B in the chromosome's unidirectional replication paths (replicores; Figures 2A–2D). When *tet* genes are placed at three positions on either side of I-site B (in 12 different isogenic strains, one for each cutsite with and one for each cutsite without the I-SceI endonuclease), the mutant frequencies

Mutations are generated both upstream and downstream of the DSB at I-site B in the chromosome's unidirectional replication paths (replicores; Figures 2A–2D). When *tet* genes are placed at three positions on either side of I-site B (in 12 different isogenic strains, one for each cutsite with and one for each cutsite without the I-SceI endonuclease), the mutant frequencies

reflect the distance from the break regardless of the upstream or downstream position (Figures 2A–2D).

Further, *tet10*, in the *ter* region of the genome, is inactive when I-site A is placed 2.4 MB away, but is subject to robust DSB-promoted mutation ( $108 \pm 29$ -fold increase relative to no-DSB control) when I-site D is engineered 12 kb away (Figures 2E and 2F). Finally, the stimulatory effect of DSBs on mutation seen in the left replicore (Figures 1A, 1B, and 2A–2F) also occurs in the right replicore; *tet13*, 18 kb from I-site C in the right replicore, shows  $44 \pm 12$ -fold enhancement of mutant frequency by I-SceI cleavage (Figures 2G and 2H), compared with the  $60 \pm 14$ - and  $22 \pm 3.7$ -fold enhancement at *tet2* and *tet3*, respectively, located 8.5 and 29.5 kb from I-site A in the left replicore (Figures 1A and 1B).

Within the  $\sim 60$  kb strong hotspots, DSB-dependent mutant frequencies are related roughly to the log of the distance between the *tet* reporter and each I-site (Figure S1), with the exception of *tet10*, 12 kb from I-site D, which is located in the *dif* (replication-terminus-proximal) region (Figures 2E, 2F, and Figure S1). The mutant frequency at this site was 2-fold higher than that of *tet11*, located 13 kb from I-site B, which is not in the *dif* region (Figures 2A and 2B). The higher RecBCD-mediated HR observed near *dif* (Louarn et al., 1991) might contribute to the higher DSB-repair-coupled mutation observed here.

### The Direction of Replication or Transcription Does Not Affect DSB-Coupled Mutation

The *E. coli* chromosome is arranged in two unidirectional replication paths, or replicores (a left arm and a right arm), extending from *oriC* to the replication terminus. We find that the local mutational hotspotting at a DSB can extend from one replicore to the other, across *oriC*. The mutant frequency reflects the distance from the DSB, regardless of whether mutagenesis is assayed on the same or opposite side of *oriC* (compare the mutant frequencies of *tet11* and *tet12*, 13 and 40 kb from their I-site [Figures 2A and 2B] with those of *tet17* and *tet13*, 9.5 and 37 kb from their I-site [Figures 2I and 2J]). *oriC* does not appear to block local DSB-dependent mutation tracts. Similarly, we find no orientation dependence or strand bias of mutagenesis relative to the direction of transcription of the reporter gene (Figure 2L). The *tet2* and *tet2'* alleles, in opposite orientations at the same site 8.5 kb from I-site A, are affected similarly by I-site A cleavage ( $46 \pm 10$ - and  $40 \pm 4$ -fold, respectively) relative to the no-DSB controls.

### Strong Local Hotspotting at DSBs Requires RecBCD-Mediated Degradation from DSB Ends

Double-strand digestion of DSB ends prior to repair in *E. coli* is carried out by the RecBCD enzyme in a manner that depends on the RecD subunit (Dillingham and Kowalczykowski, 2008). Mutants that lack RecD are repair proficient, even hyperrecombinogenic (Biek and Cohen, 1986; Chaudhury and Smith, 1985), but the repair occurs immediately at the DSB end (Thaler et al., 1989), not at a distance from the end dictated by double-strand DNA (dsDNA) degradation (per the model of Rosenberg and Hastings, 1991). We find that the strong local hotspotting between 2 and 8 to under 30 kb from the DSB requires RecD (Figure 3). The two *tet* reporters nearest I-site A, *tet1* and *tet2*, display

much reduced mutant frequencies in the *recD* null mutant, with mutagenesis reduced to the level observed for more distant sites (Figures 3A and 3B). No significant difference in frequency was observed at *tet* cassettes farther away (Figures 3A and 3B). Similarly, in the right replicore at *tet13*, mutagenesis that was provoked by cutting at the 8-kb proximal I-site E was reduced in the *recD* background to levels similar to those seen at *tet13* when the more-distant I-sites F (30 kb), G (55 kb), H (125 kb), and I (175 kb) were used (Figures 3C and 3D). Because I-site A activates mutagenesis at *tet1* and *tet2* from upstream of those reporters in the replicore, whereas I-site E activates *tet13* mutagenesis from downstream of the reporter, these data imply that dsDNA resection by RecBCD on both sides of the DSB causes the upstream and downstream mutation hotspots near DSBs.

As illustrated in the model shown in Figure 3E, left, the data indicate that the strong local hotspots result from RecBCD-mediated DNA resection and gap-filling repair synthesis using error-prone DinB polymerase. As illustrated in the model shown in Figure 3E, right, the data imply that in resection-defective *recD* mutants, this degradation is less than the 2 kb that would be required to erode and then resynthesize the closest *tet* gene to the I-site, which therefore acquires few mutations. In support of our interpretation that the *recD* mutant repairs efficiently but with smaller tracts of resection/resynthesis, we note that survival of the DSB is only slightly reduced by I-SceI cutting in *recD* ( $30 \pm 3\%$  survival relative to the uncut control, I-site E, experiments; Figures 3C and 3D) compared with the WT ( $40 \pm 3\%$  survival relative to the uncut control, same site). Thus, as reported previously (Biek and Cohen, 1986; Chaudhury and Smith, 1985; Thaler et al., 1989), *recD* mutants are DSB-repair proficient.

Further, we conclude that the long-distance weak mutational hotspotting (Figure 1B) occurs independently of RecD-dependent exonucleolytic resection, because it is unaffected in *recD* mutants (Figures 3B, *tet3*–*tet7* and Figure 3D, I-sites F–I). We suggest that this low-level mutagenesis, from 60 kb to  $\sim 1$  Mb, results from less frequent repair events that produce a processive replication fork that exceeds the window of degraded DNA and synthesizes long distances (BIR). BIR was observed in RecBC-dependent DSB repair in phage  $\lambda$  (Motamedi et al., 1999) and was hypothesized to occur in the *E. coli* chromosome (Cox et al., 2000; Kuzminov, 1995; Motamedi et al., 1999), but had not been documented there. The DinB dependence of the long-distance mutation (Figure 1C) implies that DinB, a low-processivity DNA Pol, participates, even if distributively, in long tracts of repair replication (illustrated in Figure 3F).

Mutagenesis up to 8 kb from the DSB differs significantly between the WT and *recD* strains with I-SceI cleavage. Beyond that distance, there is no significant difference ( $p = 0.0032$  at 2 kb and 0.00006 at 8 kb, and 0.28, 0.1, 0.074, 0.075, 0.051, 0.362, and 0.16 for the remaining distances, respectively; Figure 3B), implying that in both WT and *recD*, low-level long-distance mutagenesis, which we propose results from processive BIR, is functional. In Figure 3D,  $p = 0.000075$  at 5 kb, and 0.93, 0.4, 0.84, and 0.85 for the remaining distances, respectively.

RecBCD-dependent double-strand exonuclease activity is reduced at Chi sites (Dillingham and Kowalczykowski, 2008). Whereas RecBCD-dependent DNA degradation is critical for the formation of DSB-proximal mutation hotspots (Figure 3),

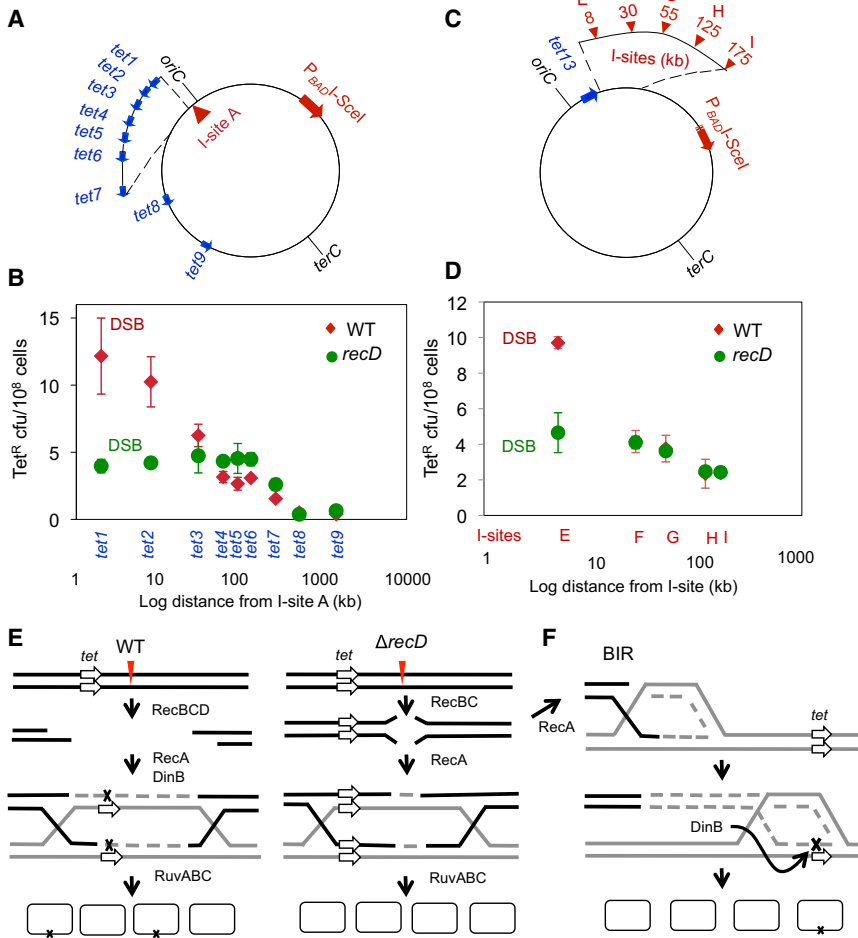

**Figure 3. The RecD Subunit of RecBCD DSB-Resection Exonuclease Is Required for Strong Local Hotspotting at DSBs**

(A) Approximate distances between I-site A and tet cassettes. Symbols as in Figure 1A.

(B) Loss of the strong local mutation hotspot downstream of the DSB in *recD* exonuclease-defective but repair-proficient mutant cells.

(C) Positions of I-sites E-I relative to *tet13* in the right chromosome arm.

(D) Loss of the I-site E-promoted strong local hotspot at *tet13*, 8 kb from I-site E, in *recD* resection-exonuclease-deficient but repair-proficient cells.

(E) Model for RecBCD-nuclease-promoted DNA resection, repair synthesis, and strong local mutation hotspotting in WT but not *recD* exonuclease-defective mutant cells. Lines: strands of DNA. Dashed lines: newly synthesized DNA. Red arrowhead: DNA DSB. Left: Our data imply that dsDNA resection by RecBCD double-strand exonuclease occurs equally well on either side of a DSB and decreases with distance from the break. Degradation may stop at a site where a productive HR event occurs that repairs the break. Our data suggest that this length is  $\leq 2\text{--}60$  kb. Mutagenesis results from error-prone DSB repair synthesis caused by DinB, which occurs when the RpoS stress response is activated (Ponder et al., 2005; Shee et al., 2011a). Confinement of repair synthesis (dashed gray lines) to the resected area can explain strong local hotspotting of mutations (black X) near DSBs in WT cells. We suggest that in *recD* null cells (right), there is a window of double-strand degradation and repair smaller than the 2 kb distance at which mutations were assayed here, consistent with previous results regarding the extreme proximity of HR to a DSB end in *recD* cells (Thaler et al., 1989).

(F) Model for weak long-distance hotspotting by BIR. We suggest that occasional extension of

repair synthesis by BIR beyond the resection points underlies the weak long-distance mutation hotspotting in both WT and *recD* backgrounds, up to 260 kb to 1 Mb from a DSB. Because this mutagenesis is RecD independent, it (and BIR more generally) may require little or no resection. Previously, RecA/BC-mediated BIR was shown to have conservative segregation of new DNA strands, as shown here, and to require high-fidelity Pol III but not RuvABC (Motamedi et al., 1999). We do not know whether the BIR that generates mutations using DinB similarly requires Pol III. Points show the means  $\pm$  SEM for three or more independent experiments. See also Figure S1.

we find that addition of extra Chi sites at I-sites makes no difference to the distribution of mutations (Figure 4). This may be because the *E. coli* genome is already effectively saturated with Chi sites (discussed below).

**DISCUSSION**

We found that DSBs produce two kinds of hotspots during stress-induced mutation: (1) strong local hotspots that form via RecD-dependent resection from DSBs and gap-filling synthesis, and (2) weak long-distance hot zones that extend to  $\sim 1$  Mb from a DSB and form independently of resection, presumably by BIR. Models for each of these mechanisms are illustrated in Figures 3E and 3F. Whereas cells that underwent stress-induced mutation appeared to be mutated genome-wide (Galhardo et al., 2007; Torkelson et al., 1997), our results suggest that in any given cell, the mutation(s) may be localized near spontaneous DSBs. Importantly, DSB-dependent stress-induced

mutagenesis, requiring DSB repair proteins, stress-response activation, and DinB, underlies most spontaneous chromosomal base substitutions and frameshift mutations in starved cells, with no I-SceI, presumably at spontaneous DSBs (Shee et al., 2011a). Thus, the fact that hotspots occur at DSBs, as reported here, is likely to bear importantly on genome evolution.

Our results provide a plausible mechanistic explanation for mutational hotspotting and possibly showers in genomes: hot regions could occur at DNA break sites. Hotspots are areas with higher mutation rates/frequencies (as observed here), and showers or clusters are hotspots with multiple mutations (not assayed here, but shown previously to occur in *E. coli* DSB-dependent stress-induced mutation [Bull et al., 2000]; discussed below). In *E. coli*, single-base differences are nonrandomly distributed across sequenced genomes with higher frequencies in poorly expressed genes, and with hot and cold regions spanning entire operons (Martincorena et al., 2012), about the size of the strong hotspots mapped here (2 to  $<60$  kb). We hypothesize

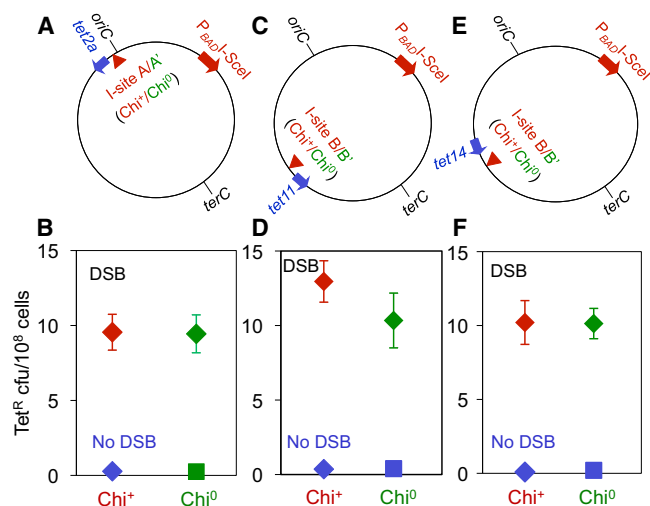

**Figure 4. Chi Sites Engineered into I-Sites Have No Effect on DSB-Proximal Hotspotting**

(A, C, and E) Approximate locations of *tet* mutation reporter genes and I-sites with and without three Chi sites in the terminus-proximal side of each I-site. *tet2a* is the same as *tet2* except that its linked selectable *cat* gene was not removed, and therefore it is 9.5 kb from I-sites A (Chi<sup>+</sup>) and A' (Chi<sup>0</sup>). The *tet11* cassette is 13 kb from I-site B/B'. *tet14* is also 13 kb from I-site B/B', but upstream.

(B, D, and F) *Tet*<sup>R</sup> mutant frequencies at (B) *tet2a*, (D) *tet11*, and (F) *tet14* with and without additional Chi sites in active orientation at each I-site. All no-DSB strains are the cutsite-only control.

Points show the mean  $\pm$  SEM for three or more independent experiments. For the distribution of active Chi sites at four of the I-sites used, see Figure S2.

that poorly expressed genes may be DSB prone and thus mutagenic. For example, poorly expressed genes are often oriented oppositely to replication paths (Brewer, 1988; Nomura and Morgan, 1977; Price et al., 2005), which could produce head-on collisions of transcription with replication. Such collisions generate DSBs in bacteria (Tehranchi et al., 2010) and eukaryotes (Bermejo et al., 2012). Other mechanisms are possible. Mutation showers in mice are  $\sim$ 30 kb (Wang et al., 2007), similar to our DSB-provoked local hotspots (e.g., Figure 1B). Mice and humans possess homologs and analogs of bacterial HR-DSB-repair proteins (Krejci et al., 2012), and three homologs and an ortholog of DinB (Nohmi, 2006); therefore, it is plausible that mouse and human mutation showers (Nik-Zainal et al., 2012; Roberts et al., 2012) could be caused by the resection/gap-filling mechanism demonstrated here.

Mutational hotspotting at DSBs could contribute to the rapid evolution of pathogens with hosts, and to cancer development, potentially by targeting specific genomic regions and, we hypothesize, by promoting mutation clusters that facilitate concerted evolution. Although rates of spontaneous DNA breakage are being quantified (Pennington and Rosenberg, 2007), the break positions remain obscure. Hotspotting could facilitate concerted evolution (Ninio, 1996; Ponder et al., 2005; Yang et al., 2008), an important problem in protein evolution (Romero and Arnold, 2009). In previous studies of DSB-dependent mutation, we observed mutation clustering (i.e., more linked double

mutants than would be expected for independent events) using a plasmid-based assay (Bull et al., 2000) with very high mutant frequencies, probably because the higher copy number allowed more efficient repair (reviewed in Rosenberg et al., 2012; Shee et al., 2011b). With the chromosomal assay used here, the mutant frequencies were too low ( $\sim$ 10<sup>-9</sup>) to measure coincident double mutants, which occur  $\geq$  3 logs less frequently (Bull et al., 2000). However, the chromosomal and plasmid-based assays behave similarly in nearly all ways measured (reviewed in Rosenberg et al., 2012; Shee et al., 2011b), suggesting that concerted evolution is likely to be promoted at DSBs in the *E. coli* chromosome, and in other organisms that utilize similar mutation mechanisms.

One surprise in this study is the small size and symmetry of strong hotspots upstream and downstream in the replicores (Figures 2A–2D). The small size is surprising because DSB repair synthesis tracts were predicted to run from a DSB to the replication terminus, potentially megabases away (e.g., Cox et al., 2000; Kuzminov, 1995). The symmetry is surprising because Chi sites, which inhibit RecBCD resection exonuclease activity, are predicted to cause asymmetrical resection in the chromosome (Kuzminov, 1995). RecBCD recognizes Chi from only one side of the Chi sequence, causing cessation of resection (Dillingham and Kowalczykowski, 2008), and there are more active Chis upstream than downstream in the replicores (Kuzminov, 1995). This predicted long degradation tracts downstream and short ones upstream (Kuzminov, 1995), which is not what our data indicate (Figures 2A–2D). Perhaps, although Chis are distributed asymmetrically, the genome is nevertheless effectively saturated with Chis in both orientations (the distribution of active Chi sites at four of the I-sites we used is shown in Figure S2). In support of this possibility, we found that additional Chi sites added at the I-site had no additional effect on the distribution of mutations (Figure 4), despite the demonstrated dependence of that distribution on RecBCD-mediated DNA degradation (Figure 3). The high frequency of Chi sites in both orientations in the genome (e.g., Figure S2) may be sufficient to create small symmetrical degradation and resynthesis tracts that cause the strong local hotspots at DSBs.

There are multiple mechanisms of spontaneous mutation (Drake, 1993). However, the DSB-dependent, stress-induced mutation mechanism studied here is a major contributor to spontaneous mutagenesis, at least in *E. coli*, in which it produces both base substitution and frameshift/indel mutations (Shee et al., 2011a), with base substitutions outnumbering the indels (Petrosino et al., 2009). Thus, DSB-dependent, stress-induced mutation is likely to contribute to evolution. DSB-dependent, stress-induced mutation is now shown to occur both nonrandomly in time, preferentially coupled to stress by its dependence on stress-response activation (Ponder et al., 2005; Shee et al., 2011a), and nonrandomly in genomic space, causing hotspots close to DSB sites (Figures 1, 2, 3, and 4). The coupling to stress responses increases mutations and potentially the ability to evolve, specifically when cells are maladapted to their environment, i.e., are stressed. Hotspotting could also speed evolution, as discussed above. Regardless of how they evolved, both of these layers of regulation of mutagenesis change part of our

picture of evolution from a chaotic one to one in which the ability to evolve has evolved, is evolving, and is a real-time (not solely historical) biological property. The identification and eventual manipulation of the molecular determinants of the ability to evolve may be crucial to efforts to combat the evolution-based problems of cancer and infectious diseases (e.g., Rosenberg et al., 2012), and is certainly necessary for a mechanistic understanding of evolution.

## EXPERIMENTAL PROCEDURES

### Strains, Media, and Growth

The *E. coli* strains used in this work are shown in Table S1. Bacteria were grown in LBH (Torkelson et al., 1997) or M9 minimal medium (Miller, 1992) supplemented with 10  $\mu$ g/ml thiamine (vitamin B1) and 0.1% glucose as the carbon source. Other additives were used at the following concentrations ( $\mu$ g/ml): ampicillin, 100; chloramphenicol, 25; kanamycin, 50; tetracycline, 10; and sodium citrate 20 mM.

### Starvation/Stress-Induced DSB-Dependent Mutation Assays

Assays were performed as previously described (Shee et al., 2011a). Single colonies from M9 glucose vitamin B1 (B1) plates that had been incubated for ~22 h at 37°C were inoculated into 5 ml of M9 glucose B1 broth and grown for 12 h with shaking. These liquid cultures were diluted 1:100 into the same medium and grown for 8–10 h, diluted 1:100 and grown for 12 h to saturation, and then incubated further for 72 h. Three independent cultures per genotype were used for each experiment. Mutant frequencies were determined as colony-forming units (cfu) on LBH glucose tetracycline (Tet<sup>R</sup> mutant cfu) and LBH glucose plates (total cfu), and the means  $\pm$  SEMs for three or more independent experiments are displayed. The p values were determined by two-tailed Student's t test.

### Movable *tet* Reporter Gene

We used the movable *tetA* +1 bp mutation-reporter allele linked with a selectable *cat* cassette developed by Shee et al. (2011a). The precise location of each insertion is given in Table S2. We constructed the *tet* alleles and I-SceI-cutsite-carrying strains using the primer sets listed in Table S3.

### Chromosomal I-SceI Cleavage System and Cutsites

We used the chromosomal I-SceI endonuclease expression system (Gumbiner-Russo et al., 2001), which was previously used to introduce DSBs into F'128 (Ponder et al., 2005), and in the chromosome (Shee et al., 2011a, 2001b). The 18bp I-SceI cutsite sequence was engineered into various loci by inclusion in primers for amplifying a Kan cassette (Table S1) and recombined into the genomes. The chromosomal I-SceI gene is expressed from the *P*<sub>BAD</sub> promoter and thus is induced strongly by arabinose and weakly in the absence of glucose (Ponder et al., 2005), the condition used here and in a previous work (Shee et al., 2011a). In all experiments measuring mutagenesis and/or efficiency of DSB formation by the I-SceI system, terminal cultures were shown to retain the functional I-SceI gene and cleavage site by quantitative measurement of arabinose sensitivity, comparing cfu titers on arabinose and glucose plates. The typical frequencies of arabinose-resistant mutants, which have acquired a mutation in the I-SceI cutsite or gene (Ponder et al., 2005), were between 10<sup>-4</sup> and 10<sup>-5</sup>, as observed previously (Ponder et al., 2005; Shee et al., 2011a), demonstrating that most cells in our experiments were DSB competent. Arabinose-resistant mutants consist mostly of cutsite mutants, presumably from low-level, Ku-independent, nonhomologous end-joining (Ponder et al., 2005). The locations of the cutsites are given in Table S2.

## SUPPLEMENTAL INFORMATION

Supplemental Information includes two figures, three tables, and a list of strains used in each figure and can be found with this article online at <http://dx.doi.org/10.1016/j.celrep.2012.08.033>.

## LICENSING INFORMATION

This is an open-access article distributed under the terms of the Creative Commons Attribution-NonCommercial-No Derivative Works 3.0 Unported License (CC-BY-NC-ND; <http://creativecommons.org/licenses/by-nc-nd/3.0/legalcode>).

## ACKNOWLEDGMENTS

This paper is dedicated to Frank Stahl, whose strategies we aimed to emulate. We thank D. Bates, H. Dierick, R. Frisch, R. Galhardo, J.E. Haber, J. Halliday, P.J. Hastings, C. Herman, G. Ira, A. Kuzminov, E. Rogers, J.D. Wang, and three anonymous reviewers for helpful comments on the manuscript. This work was supported by National Institutes of Health grant R01-GM53158.

Received: July 6, 2012

Revised: August 6, 2012

Accepted: August 30, 2012

Published online: October 4, 2012

## REFERENCES

- Akerlund, T., Nordström, K., and Bernander, R. (1995). Analysis of cell size and DNA content in exponentially growing and stationary-phase batch cultures of *Escherichia coli*. *J. Bacteriol.* 177, 6791–6797.
- Albano, F., Anelli, L., Zagaria, A., Coccaro, N., Casieri, P., Rossi, A.R., Vicari, L., Liso, V., Rocchi, M., and Specchia, G. (2010). Non random distribution of genomic features in breakpoint regions involved in chronic myeloid leukemia cases with variant t(9;22) or additional chromosomal rearrangements. *Mol. Cancer* 9, 120.
- Bermejo, R., Lai, M.S., and Foiani, M. (2012). Preventing replication stress to maintain genome stability: resolving conflicts between replication and transcription. *Mol. Cell* 45, 710–718.
- Biek, D.P., and Cohen, S.N. (1986). Identification and characterization of *recD*, a gene affecting plasmid maintenance and recombination in *Escherichia coli*. *J. Bacteriol.* 167, 594–603.
- Brewer, B.J. (1988). When polymerases collide: replication and the transcriptional organization of the *E. coli* chromosome. *Cell* 53, 679–686.
- Bull, H.J., McKenzie, G.J., Hastings, P.J., and Rosenberg, S.M. (2000). Evidence that stationary-phase hypermutation in the *Escherichia coli* chromosome is promoted by recombination. *Genetics* 154, 1427–1437.
- Burch, L.H., Yang, Y., Sterling, J.F., Roberts, S.A., Chao, F.G., Xu, H., Zhang, L., Walsh, J., Resnick, M.A., Mieczkowski, P.A., and Gordenin, D.A. (2011). Damage-induced localized hypermutability. *Cell Cycle* 10, 1073–1085.
- Caporale, L.H. (2006). *The Implicit Genome* (New York: Oxford University Press).
- Chaudhury, A.M., and Smith, G.R. (1985). Role of *Escherichia coli* RecBC enzyme in SOS induction. *Mol. Gen. Genet.* 201, 525–528.
- Cox, M.M., Goodman, M.F., Kreuzer, K.N., Sherratt, D.J., Sandler, S.J., and Marians, K.J. (2000). The importance of repairing stalled replication forks. *Nature* 404, 37–41.
- Deem, A., Keszthelyi, A., Blackgrove, T., Vayl, A., Coffey, B., Mathur, R., Chabes, A., and Malkova, A. (2011). Break-induced replication is highly inaccurate. *PLoS Biol.* 9, e1000594.
- Di Noia, J.M., and Neuberger, M.S. (2007). Molecular mechanisms of antibody somatic hypermutation. *Annu. Rev. Biochem.* 76, 1–22.
- Dillingham, M.S., and Kowalczykowski, S.C. (2008). RecBCD enzyme and the repair of double-stranded DNA breaks. *Microbiol. Mol. Biol. Rev.* 72, 642–671.
- Drake, J.W. (1993). General antimutators are improbable. *J. Mol. Biol.* 229, 8–13.
- Drake, J.W. (2007a). Mutations in clusters and showers. *Proc. Natl. Acad. Sci. USA* 104, 8203–8204.
- Drake, J.W. (2007b). Too many mutants with multiple mutations. *Crit. Rev. Biochem. Mol. Biol.* 42, 247–258.

- Galhardo, R.S., Hastings, P.J., and Rosenberg, S.M. (2007). Mutation as a stress response and the regulation of evolvability. *Crit. Rev. Biochem. Mol. Biol.* **42**, 399–435.
- Gumbiner-Russo, L.M., Lombardo, M.-J., Ponder, R.G., and Rosenberg, S.M. (2001). The TGV transgenic vectors for single-copy gene expression from the *Escherichia coli* chromosome. *Gene* **273**, 97–104.
- Harris, R.S., Longerich, S., and Rosenberg, S.M. (1994). Recombination in adaptive mutation. *Science* **264**, 258–260.
- Hicks, W.M., Kim, M., and Haber, J.E. (2010). Increased mutagenesis and unique mutation signature associated with mitotic gene conversion. *Science* **329**, 82–85.
- Krejci, L., Altmannova, V., Spirek, M., and Zhao, X. (2012). Homologous recombination and its regulation. *Nucleic Acids Res.* **40**, 5795–5818.
- Kuzminov, A. (1995). Collapse and repair of replication forks in *Escherichia coli*. *Mol. Microbiol.* **16**, 373–384.
- Louarn, J.M., Louarn, J., François, V., and Patte, J. (1991). Analysis and possible role of hyperrecombination in the termination region of the *Escherichia coli* chromosome. *J. Bacteriol.* **173**, 5097–5104.
- Ma, X., Rogacheva, M.V., Nishant, K.T., Zanders, S., Bustamante, C.D., and Alani, E. (2012). Mutation hot spots in yeast caused by long-range clustering of homopolymeric sequences. *Cell Rep.* **1**, 36–42.
- Martincorena, I., Seshasayee, A.S., and Luscombe, N.M. (2012). Evidence of non-random mutation rates suggests an evolutionary risk management strategy. *Nature* **485**, 95–98.
- Mayr, E. (1985). *The Growth of Biological Thought: Diversity, Evolution, and Inheritance* (Cambridge, MA: Harvard University Press).
- Miller, J.H. (1992). *A Short Course in Bacterial Genetics* (Cold Spring Harbor, NY: Cold Spring Harbor Laboratory Press).
- Motamedi, M.R., Szigety, S.K., and Rosenberg, S.M. (1999). Double-strand-break repair recombination in *Escherichia coli*: physical evidence for a DNA replication mechanism *in vivo*. *Genes Dev.* **13**, 2889–2903.
- Moxon, E.R., Rainey, P.B., Nowak, M.A., and Lenski, R.E. (1994). Adaptive evolution of highly mutable loci in pathogenic bacteria. *Curr. Biol.* **4**, 24–33.
- Nik-Zainal, S., Alexandrov, L.B., Wedge, D.C., Van Loo, P., Greenman, C.D., Raine, K., Jones, D., Hinton, J., Marshall, J., Stebbings, L.A., et al.; Breast Cancer Working Group of the International Cancer Genome Consortium. (2012). Mutational processes molding the genomes of 21 breast cancers. *Cell* **149**, 979–993.
- Ninio, J. (1996). Gene conversion as a focusing mechanism for correlated mutations: a hypothesis. *Mol. Gen. Genet.* **251**, 503–508.
- Nohmi, T. (2006). Environmental stress and lesion-bypass DNA polymerases. *Annu. Rev. Microbiol.* **60**, 231–253.
- Nomura, M., and Morgan, E.A. (1977). Genetics of bacterial ribosomes. *Annu. Rev. Genet.* **11**, 297–347.
- Parkhomchuk, D., Amstislavskiy, V., Soldatov, A., and Ogrzyko, V. (2009). Use of high throughput sequencing to observe genome dynamics at a single cell level. *Proc. Natl. Acad. Sci. USA* **106**, 20830–20835.
- Pennington, J.M., and Rosenberg, S.M. (2007). Spontaneous DNA breakage in single living *Escherichia coli* cells. *Nat. Genet.* **39**, 797–802.
- Petrosino, J.F., Galhardo, R.S., Morales, L.D., and Rosenberg, S.M. (2009). Stress-induced beta-lactam antibiotic resistance mutation and sequences of stationary-phase mutations in the *Escherichia coli* chromosome. *J. Bacteriol.* **191**, 5881–5889.
- Ponder, R.G., Fonville, N.C., and Rosenberg, S.M. (2005). A switch from high-fidelity to error-prone DNA double-strand break repair underlies stress-induced mutation. *Mol. Cell* **19**, 791–804.
- Price, M.N., Alm, E.J., and Arkin, A.P. (2005). Interruptions in gene expression drive highly expressed operons to the leading strand of DNA replication. *Nucleic Acids Res.* **33**, 3224–3234.
- Roberts, S.A., Sterling, J., Thompson, C., Harris, S., Mav, D., Shah, R., Klimczak, L.J., Kryukov, G.V., Malc, E., Mieczkowski, P.A., et al. (2012). Clustered mutations in yeast and in human cancers can arise from damaged long single-strand DNA regions. *Mol. Cell* **46**, 424–435.
- Romero, P.A., and Arnold, F.H. (2009). Exploring protein fitness landscapes by directed evolution. *Nat. Rev. Mol. Cell Biol.* **10**, 866–876.
- Rosenberg, S.M., and Hastings, P.J. (1991). The split-end model for homologous recombination at double-strand breaks and at Chi. *Biochimie* **73**, 385–397.
- Rosenberg, S.M., Longerich, S., Gee, P., and Harris, R.S. (1994). Adaptive mutation by deletions in small mononucleotide repeats. *Science* **265**, 405–407.
- Rosenberg, S.M., Shee, C., Frisch, R.L., and Hastings, P.J. (2012). Stress-induced mutation via DNA breaks in *Escherichia coli*: a molecular mechanism with implications for evolution and medicine. *Bioessays* **34**, 885–892.
- Shee, C., Gibson, J.L., Darrow, M.C., Gonzalez, C., and Rosenberg, S.M. (2011a). Impact of a stress-inducible switch to mutagenic repair of DNA breaks on mutation in *Escherichia coli*. *Proc. Natl. Acad. Sci. USA* **108**, 13659–13664.
- Shee, C., Ponder, R., Gibson, J.L., and Rosenberg, S.M. (2011b). What limits the efficiency of double-strand break-dependent stress-induced mutation in *Escherichia coli*? *J. Mol. Microbiol. Biotechnol.* **21**, 8–19.
- Strathern, J.N., Shafer, B.K., and McGill, C.B. (1995). DNA synthesis errors associated with double-strand-break repair. *Genetics* **140**, 965–972.
- Symington, L.S., and Gautier, J. (2011). Double-strand break end resection and repair pathway choice. *Annu. Rev. Genet.* **45**, 247–271.
- Tehranchi, A.K., Blankschien, M.D., Zhang, Y., Halliday, J.A., Srivatsan, A., Peng, J., Herman, C., and Wang, J.D. (2010). The transcription factor DksA prevents conflicts between DNA replication and transcription machinery. *Cell* **141**, 595–605.
- Thaler, D.S., Sampson, E., Siddiqi, I., Rosenberg, S.M., Thomason, L.C., Stahl, F.W., and Stahl, M.M. (1989). Recombination of bacteriophage lambda in recD mutants of *Escherichia coli*. *Genome* **31**, 53–67.
- Torkelson, J., Harris, R.S., Lombardo, M.J., Nagendran, J., Thulin, C., and Rosenberg, S.M. (1997). Genome-wide hypermutation in a subpopulation of stationary-phase cells underlies recombination-dependent adaptive mutation. *EMBO J.* **16**, 3303–3311.
- Wang, J., Gonzalez, K.D., Scaringe, W.A., Tsai, K., Liu, N., Gu, D., Li, W., Hill, K.A., and Sommer, S.S. (2007). Evidence for mutation showers. *Proc. Natl. Acad. Sci. USA* **104**, 8403–8408.
- Yang, Y., Sterling, J., Storici, F., Resnick, M.A., and Gordenin, D.A. (2008). Hypermutability of damaged single-strand DNA formed at double-strand breaks and uncapped telomeres in yeast *Saccharomyces cerevisiae*. *PLoS Genet.* **4**, e1000264.



## SUPPLEMENTAL REFERENCES

- Baba, T., Ara, T., Hasegawa, M., Takai, Y., Okumura, Y., Baba, M., Datsenko, K.A., Tomita, M., Wanner, B.L., and Mori, H. (2006). Construction of *Escherichia coli* K-12 in-frame, single-gene knockout mutants: the Keio collection. *Mol. Syst. Biol.* *2*, 2006.0008.
- Bull, H.J., Lombardo, M.J., and Rosenberg, S.M. (2001). Stationary-phase mutation in the bacterial chromosome: recombination protein and DNA polymerase IV dependence. *Proc. Natl. Acad. Sci. USA* *98*, 8334–8341.
- Cairns, J., and Foster, P.L. (1991). Adaptive reversion of a frameshift mutation in *Escherichia coli*. *Genetics* *128*, 695–701.
- Cherepanov, P.P., and Wackernagel, W. (1995). Gene disruption in *Escherichia coli*: TcR and KmR cassettes with the option of Flp-catalyzed excision of the antibiotic-resistance determinant. *Gene* *158*, 9–14.
- Chumley, F.G., Menzel, R., and Roth, J.R. (1979). Hfr formation directed by Tn10. *Genetics* *91*, 639–655.
- Datsenko, K.A., and Wanner, B.L. (2000). One-step inactivation of chromosomal genes in *Escherichia coli* K-12 using PCR products. *Proc. Natl. Acad. Sci. USA* *97*, 6640–6645.
- Dillingham, M.S., and Kowalczykowski, S.C. (2008). RecBCD enzyme and the repair of double-stranded DNA breaks. *Microbiol. Mol. Biol. Rev.* *72*, 642–671.
- Gumbiner-Russo, L.M., Lombardo, M.-J., Ponder, R.G., and Rosenberg, S.M. (2001). The TGV transgenic vectors for single-copy gene expression from the *Escherichia coli* chromosome. *Gene* *273*, 97–104.
- Kovach, M.E., Elzer, P.H., Hill, D.S., Robertson, G.T., Farris, M.A., Roop, R.M., 2nd, and Peterson, K.M. (1995). Four new derivatives of the broad-host-range cloning vector pBBR1MCS, carrying different antibiotic-resistance cassettes. *Gene* *166*, 175–176.
- McKenzie, G.J. (2002). The SOS response and low fidelity DNA polymerase IV in adaptive mutation in *Escherichia coli*. PhD thesis, Baylor College of Medicine, Houston, TX.
- McKenzie, G.J., Harris, R.S., Lee, P.L., and Rosenberg, S.M. (2000). The SOS response regulates adaptive mutation. *Proc. Natl. Acad. Sci. USA* *97*, 6646–6651.
- McKenzie, G.J., Magner, D.B., Lee, P.L., and Rosenberg, S.M. (2003). The *dinB* operon and spontaneous mutation in *Escherichia coli*. *J. Bacteriol.* *185*, 3972–3977.
- Miller, J.H. (1992). *A Short Course in Bacterial Genetics* (Cold Spring Harbor, NY: Cold Spring Harbor Laboratory Press).
- Ponder, R.G., Fonville, N.C., and Rosenberg, S.M. (2005). A switch from high-fidelity to error-prone DNA double-strand break repair underlies stress-induced mutation. *Mol. Cell* *19*, 791–804.
- Sambrook, J., and Russell, D.W. (2001). *Molecular Cloning—A Laboratory Manual* (Cold Spring Harbor, NY: Cold Spring Harbor Laboratory Press).
- Shee, C., Gibson, J.L., Darrow, M.C., Gonzalez, C., and Rosenberg, S.M. (2011). Impact of a stress-inducible switch to mutagenic repair of DNA breaks on mutation in *Escherichia coli*. *Proc. Natl. Acad. Sci. USA* *108*, 13659–13664.

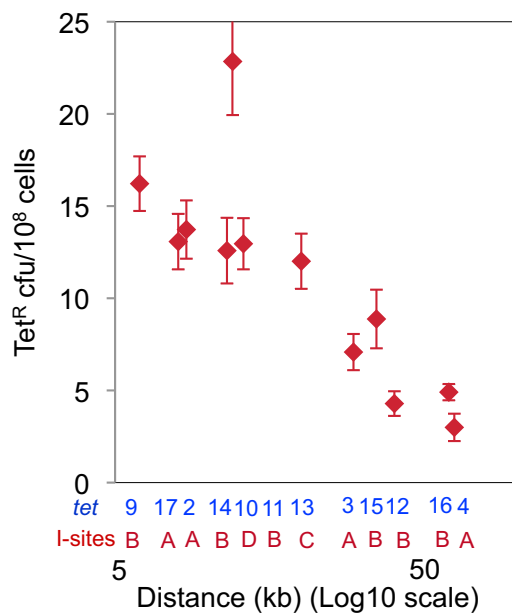

**Figure S1. Mutant Frequencies in Hotspots Decline Logarithmically with Distance from DSBs at Multiple Genomic Sites, Related to Figures 1, 2, and 3**

Data from *tet* reporter genes and I-sites at multiple chromosomal positions from experiments in Figures 1–3. The single outlying *tet* reporter/I-site pair is the terminus-proximal *tet10* and I-site D (Figures 2E and 2F) as discussed in the text.

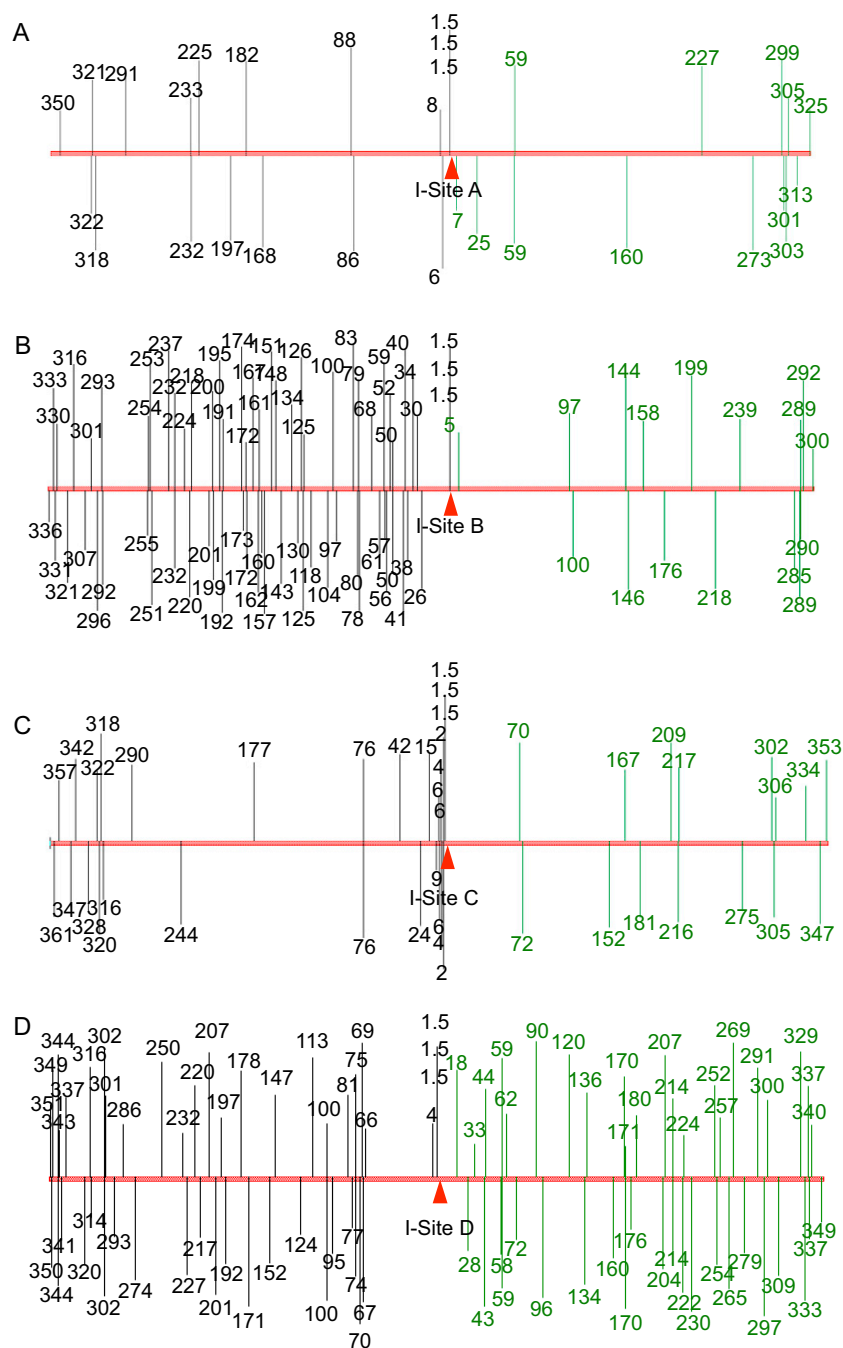

**Figure S2. Maps of Chi Sites on Either Side of I-Sites A–D in Active Orientation with Respect to Each I-Site, Related to Figure 4**

Chi sites are recognized by RecBCD enzyme as it degrades DNA from a DSB end, and are recognized only if RecBCD encounters them from the 3' GG side of the 5'GCTGGTGG3' Chi sequence (Dillingham and Kowalczykowski, 2008). Positions are shown of Chi sites in active orientation with respect to the DSB that is created upon cleavage of the I-site (that is, the 3' side of the 5'GCTGGTGG3' Chi sequence toward the I site) for I-sites A–D. Numbers represent the distance in kilobases from the I-site. In each map, left is origin-proximal and right is terminus-proximal. Positions of Chi sites that would be active with the I-site DSB downstream (those oriented 5'GCTGGTGG3' from origin to terminus) are shown in black, and those that would be active with the I-site DSB upstream (oriented 3'GGTGGTGG5' origin to terminus) are shown in green.
